## Poor sleep quality, dementia status and their association with all-cause mortality among older US adults

May A. Beydoun<sup>1,\*</sup>, Rio Tate<sup>1,\*</sup>, Michael F. Georgescu<sup>1</sup>, Alyssa A. Gamaldo<sup>2</sup>, Christian A. Maino Vieytes<sup>1</sup>, Hind A. Beydoun<sup>3,4</sup>, Nicole Noren Hooten<sup>1</sup>, Michele K. Evans<sup>1,#</sup>, Alan B. Zonderman<sup>1,#</sup>

<sup>1</sup>Laboratory of Epidemiology and Population Sciences, National Institute on Aging, Intramural Research Program, NIA/NIH/IRP, Baltimore, MD 21224, USA

<sup>2</sup>Department of Psychology, Clemson University, Clemson, SC 29634, USA

<sup>3</sup>Department of Veterans Affairs, VA National Center on Homelessness Among Veterans, Washington, DC 20420, USA

<sup>4</sup>Department of Management, Policy, and Community Health, School of Public Health, University of Texas Health Science Center at Houston, Houston, TX 77030, USA

\*Co-first authors

#Co-senior authors

**Correspondence to:** May A. Beydoun; **email:** [baydounm@mail.nih.gov](mailto:baydounm@mail.nih.gov)

**Keywords:** sleep quality, dementia, mortality, aging, cohort studies

**Received:** January 23, 2024

**Accepted:** August 20, 2024

**Published:** September 4, 2024

**Copyright:** © 2024 Beydoun et al. This is an open access article distributed under the terms of the [Creative Commons Attribution License](https://creativecommons.org/licenses/by/4.0/) (CC BY 4.0), which permits unrestricted use, distribution, and reproduction in any medium, provided the original author and source are credited.

### ABSTRACT

**Background:** Evidence points to associations between sleep quality, dementia, and mortality. We examined whether poor sleep quality mediated or moderated the association between dementia and mortality risk among older US adults and vice versa, and whether these associations differed by sex and by race.

**Methods:** The study investigated bi-directional associations between sleep quality, dementia and mortality in older US adults using data from the Health and Retirement Study ( $N = 6,991$ , mean age = 78.1y, follow-up: 2006–2020, number of deaths = 4,938). It tested interactions and mediating effects, using Cox proportional hazards models and four-way decomposition models.

**Results:** Poor sleep quality was associated with increased mortality risk, particularly among male and White older adults. However, the association was reversed in the fully adjusted model, with a 7% decrease in risk per tertile. Probable dementia was associated with a two-fold increase in mortality risk, with a stronger association found among White adults. The association was markedly attenuated in the fully adjusted models. Sleep quality-stratified models showed a stronger positive association between dementia and mortality among individuals with better sleep quality. Both mediation and interaction were involved in explaining the total effects under study, though statistically significant total effects were mainly composed of controlled direct effects.

**Conclusions:** Poor sleep quality is directly related to mortality risk before lifestyle and health-related factors are adjusted. Dementia is linked to mortality risk, especially in individuals with better sleep quality, males, and White older adults. Future research should explore the underlying mechanisms.

## INTRODUCTION

Inadequate sleep duration and poor sleep quality are becoming significant public health issues linked to cardiometabolic risk factors like obesity, particularly with an aging population [1]. Approximately 20% of adults are impacted by health issues associated with substandard sleep quality or insufficient sleep durations [2, 3]. Simultaneously, maintaining a healthy cognitive function is necessary for carrying out essential everyday tasks, such as remembering to take prescribed medication or prepare meals [4, 5]. Attention, working, short-term or long-term memory, motor coordination and reasoning all have an impact on cognition [4, 5]. As individuals get older, the occurrence of brain disorders that may affect cognitive abilities, such as stroke and dementia, becomes more common [4, 5]. This can engender obstacles for people when it comes to taking on and completing daily chores [4, 5]. Dementia is characterized by a decline in overall cognitive functioning across several areas, as well as the inability to perform routine activities [4–6]. The prevalence of dementia among individuals aged 60 and above is estimated to be 4.7%, with an annual increase of 4.6–7.7 million new cases globally (equivalent to 3.5–10.5 cases per 1,000 individuals) [5, 7–9].

More importantly, research has demonstrated that the occurrence of dementia is indicative of a greater risk of future all-cause mortality (e.g., [10]). Furthermore, there is increasing evidence suggesting that both short and lengthy sleep durations, as well as other disturbances, are associated with higher risks of mortality from all causes (e.g., [3, 11]). In addition, there have been limited attempts in prospective cohort studies to assess the chronological connection between sleep and neurodegenerative illnesses, such as dementia and age-related cognitive decline (e.g., [12–15]). The studies usually found that insufficient sleep length, low sleep quality, and sleep disorders were associated with negative outcomes indicating impaired cognitive aging, including various dementing illnesses. In addition, there is further evidence suggesting that preclinical dementia can impact sleep patterns and disorders (e.g., [16]).

Considering the interconnection between sleep, dementia, and the rate of mortality, it is important to investigate the pathways and potential interactions among them as significant research inquiries. However, a systematic study has been lacking to date that has thoroughly investigated the mediating and moderating association between sleep, dementia, and the risk of death in older persons, especially in nationally representative samples. It is crucial as well to analyze those relationships within different sex and ethnic categories. Existing research reports associations between sleep and dementia,

dementia and mortality, and sleep and mortality among older persons. However, there are no studies that specifically investigate the bi-directional pathways that link sleep quality, dementia, and mortality risk.

This study aims to investigate the relationship between poor sleep quality and dementia status with mortality risk. We examine this relationship independently of potential confounding factors, while also considering the influence of sex and race. The study is conducted using a sub-sample of the Health and Retirement Study (HRS) with complete algorithmically defined dementia status and probability outcomes. The participants in this sub-sample have a mean age of approximately 78 years. Furthermore, we conduct a simultaneous examination to assess the potential interaction between poor sleep quality and dementia outcomes in determining the risk of mortality. We also investigate the bidirectional mediation effects of “poor sleep quality” and “dementia status” on mortality, with dementia status mediating the relationship between poor sleep quality and mortality, and poor sleep quality mediating the relationship between dementia status and mortality. To analyze these relationships, we employ four-way decomposition models.

## METHODS

### Database

The HRS is an ongoing study that follows a group of adults in the United States who are 50 years of age or older [17, 18]. The survey has been conducted every two years since 1992 [17, 18]. The HRS is being funded by the National Institute on Aging (grant number U01AG009740) and the Social Security Administration [17, 18]. Previous publications have provided comprehensive explanations of HRS approaches [17–20]. In 2006, HRS introduced the Enhanced Face-to-Face Interview (EFTF), which includes anthropometric measurements, physical performance tests, blood and saliva samples, and self-administered questionnaires covering among other psychosocial domains of interest [17, 18]. Out of all the primary sample units (PSUs), almost 50% of the houses that had at least one resident responder were selected for the EFTF interview [17, 18].

An initial EFTF interview was carried out with a randomly selected half-sample of participants from the 2006 HRS wave [17, 18]. In 2008, the second half sample was subsequently interviewed [17, 18]. Similarly, in 2010, households within the same cohort were randomly assigned to one of these two groups, and the collection of EFTF data started either in 2010 or 2012 [17, 18]. In order to ensure that both members of a family received the identical request, the sample was

selected at the household level [17, 18]. The newly married partners of those who were selected for the EFTF interview were also requested to participate in the same process [17, 18]. Consequently, in households when the members are coupled, both individuals in the pair were selected [17, 18]. Certain participants in the EFTF study were exempt from completing the physical measurements or biomarker assessments [17, 18]. The individuals in this group were required to be interviewed through a proxy, resided in nursing homes, or refused a face-to-face interview but consented to being interviewed over the phone [17, 18].

### **Standard protocol approvals, registrations, and patient consents**

The Institutional Review Board (IRB) at the University of Michigan, Ann Arbor (NIA U01 AG009740; URL: Institutional Review Board Information (umich.edu)) granted approval after the procedures were carried out in compliance with the institution or the regional committee on human experimentation's ethical standards [17, 18]. The ethics board found that there was no need for or waiver of participant consent [17, 18]. The National Institutes of Health's Intramural Research Program granted approval for the current retrospective analysis of the parent IRB-approved study, which was deemed to be research not involving human subjects [17, 18].

### **Study sample**

Starting from the 43,561 HRS participants (1992–2018) that were initially included in the longitudinal RAND file, 18,469 were still alive in 2006 and included in the study; of them, 17,809 were older than 50 years (Supplementary Figure 1). Of this sub-sample, 7,115 had information on their dementia status in 2006. After accounting for missing data on the sleep quality scale, the final selected sample consisted of up to 6,991 persons who were over 50 years old, with simultaneous availability of dementia and sleep quality data. These participants were followed up until the end of 2020 to determine their mortality status from all causes. The final sample's mean age in 2006 was 78 years old, given the exclusion of participants without dementia status data, resulting in an age range of 60–104 years old.

### **Mortality from all causes**

In this study, the time to all-cause death between 2006 and 2020 was the outcome variable. The most recent measurements of exposures and mediators (2006 for both) were used to follow-up on all-cause mortality. By linking data from the population register and

interviewing informants or other knowledgeable individuals, the HRS was able to identify and ascertain deaths [21]. Tracker file variables were utilized which were updated to 2020 (v2). Of the 6,991 individuals chosen for our final analytic sample, 4,938 deaths occurred during the follow-up period of 2006–2020 from any cause, with a known approximate date of death (month and year). The period between the approximate age at death and the age at examination in 2006, which was calculated at the end of the wave, was used to determine the time to death [18]. Years were used to quantify the passage of follow-up time. This period of follow-up for those who survived to the end of 2020 was roughly 15 years. Overall, the eligible sample's mortality rate was estimated at 74 per 1000 P-Y (Figure 1).

### **Dementia occurrence measures**

Similar to a previous study [18], the dataset file named "hrs dementia\_2021\_1109.sas7bdat" is accessible to the public and includes probabilities and classifications related to dementia. These data presented pertain to individuals aged 60 and above who participated in the 2006 survey. The respondents were categorized as such if their self-reported race/ethnicity was "non-Hispanic white", "non-Hispanic black", or "Hispanic". Three recently created algorithms were utilized: a modified iteration of an algorithm initially devised by Hurd and colleagues (Modified Hurd Algorithm), a novel logistic model informed by experts (Expert Algorithm), and a Least Absolute Shrinkage and Selection Operator (LASSO) algorithm. These algorithms were trained and tested using data from the Health and Retirement Study (HRS) as well as data from all four waves of the Aging, Demographics, and Memory Study (ADAMS; <http://hrsonline.isr.umich.edu/index.php?p=shoavail&iyear=XB>). The models demonstrated a sensitivity range of 77–83%, specificity range of 92–94%, and an overall out-of-sample performance accuracy range of 90–92%.

We will briefly include some cursory information regarding each probability algorithm, but we refer the reader to a technical appendix made available in an earlier study [18]. The Modified Hurd Algorithm comprised training an ordered probit model on the ADAMS subset of participants with cognitive testing data, which were obtained through the Telephone Interview for Cognitive Status (TICS) or the Informant Questionnaire on Cognitive Decline in the Elderly (IQCODE). The probit model included a vector of prespecified participant characteristics and variables. It was then used to predict the probability of cognitive status outcomes (an ordinal factor—*dementia, cognitive impairment but not dementia, and aging normally*) for each subject. For a given subject, the outcome with the

highest probability was the dementia classification assigned to that individual. The Expert Algorithm used a logistic regression model trained on ADAMS subjects, in a similar fashion as the Modified Hurd Algorithm, to classify subjects into *dementia* and *no dementia* categories. Classification of subjects into those categories used race-specific probability thresholds that maximized the sensitivity and specificity and were obtained via 10-fold cross-validation. Finally, the LASSO algorithm was similar to the Expert Algorithm with the exception that the trained logistic regression model for dementia classification included LASSO penalization. Citations for these methods are available in the Supplementary Materials (Supplementary Method 1).

### Poor sleep quality

The assessment of poor sleep quality was conducted using a set of 5 items, with 4 items scored on a Likert scale ranging from 1 to 3, and one item measured as a binary outcome. The items KC083 (insomnia), KC084 (nocturnal awakenings), KC085 (early morning awakenings), and KC086 (feeling rested in the morning) can be found in section C of the physical health questionnaire for the 2006 wave of data (public use data, wave K). A supplementary binary measure, coded as KC232U2, indicates the use of medication for sleep. More information can be found at this URL:

[https://hrs.isr.umich.edu/sites/default/files/meta/2006/codebook/h06c\\_ri.htm](https://hrs.isr.umich.edu/sites/default/files/meta/2006/codebook/h06c_ri.htm). The items were subjected to reverse coding in order to reliably represent lower sleep quality with higher scores (1 = good quality, 2 = medium quality, 3 = poor quality), except for medication use (0 = no, 1 = yes). Next, the five components were added together and adjusted to a new scale that ranges from 0 to 9. Additional information can be found in Supplementary Method 2.

### Covariates

#### Socio-demographic factors

Our study took into account various socio-demographic factors, such as gender (male, female), age as of 2006, race (White vs. Black/Hispanic/Others), marital status (never married, married/partnered, separated/divorced, widowed), education (no degree, general educational development, high school graduate, some college, college degree or higher), employment status (working, not working), and total wealth (in US dollars) (<25,000, 25,000–124,999, 125,000–299,000, 300,000+), as was done in previous studies [17, 18, 22]. Elsewhere, a review has examined the connections between socioeconomic characteristics and sleep, dementia risk, and mortality [23]. The evidence suggests that lower socioeconomic status has unfavorable consequences on these outcomes.

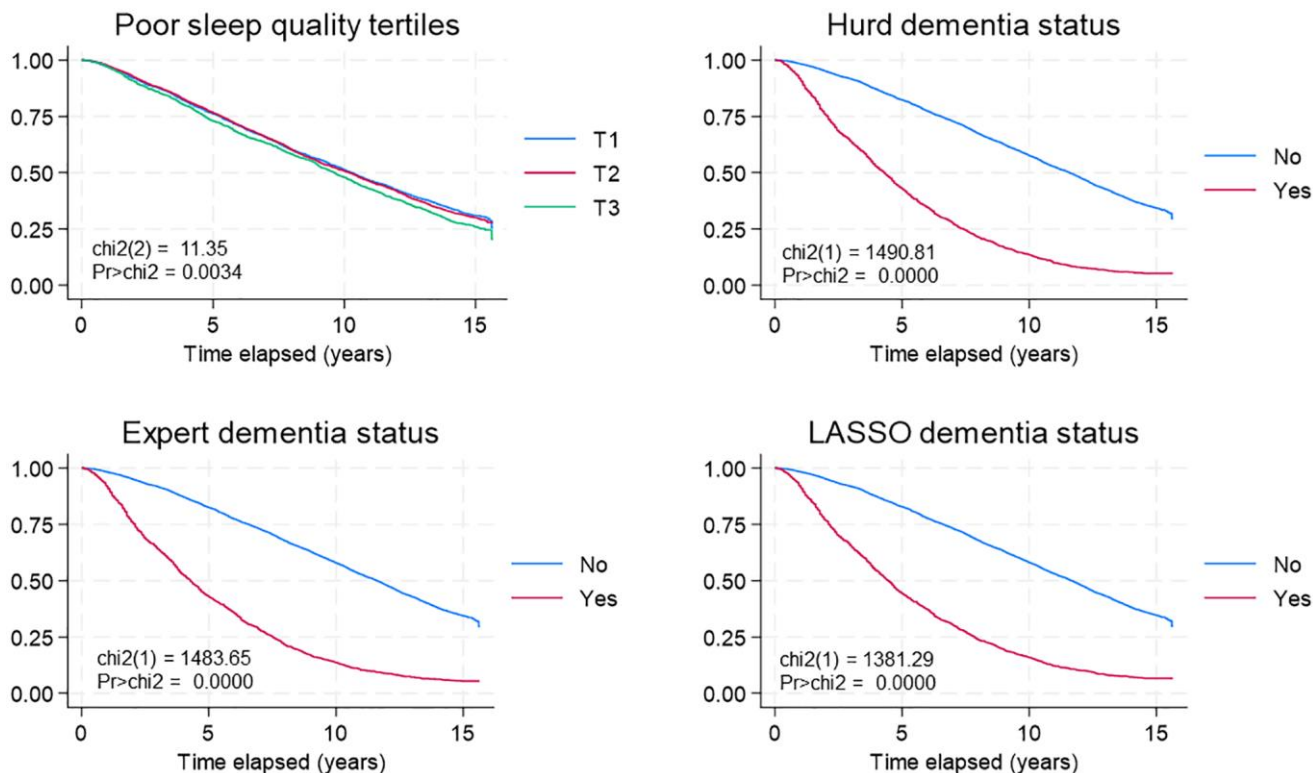

**Figure 1. Sleep quality, dementia status and all-cause mortality: K-M survival curves.** Abbreviations: chi2: Chi-square statistic; HRS: Health and Retirement Study; K-M: Kaplan Meier; LASSO: Least Absolute Shrinkage and Selection Operator; Pr: Probability.

### **Lifestyle factors**

The lifestyle metrics that were taken into account were the individual's smoking status (categorized as never smoker, past smoker, or current smoker) and the frequency of moderate/vigorous activity (categorized as never, 1–4 times per month, or more than once per week) [17, 18, 22]. Elsewhere, a review examines the correlation between these specific lifestyle characteristics and sleep, dementia risk, and mortality [24–27]. These studies also suggest that making poor lifestyle choices, such as engaging in less physical activity and smoking more frequently, is connected with negative consequences.

### **Health-related factors**

Participants were asked to rate their health as either “excellent/very good/good” or “fair/poor” [17, 18, 22]. In addition, the HRS collected self-reported data on weight and height, as well as information on the presence of cardiometabolic risk factors and chronic illnesses, as diagnosed by a physician [17, 18, 22]. The HRS inquired about depressed symptoms using an 8-item Centers for Epidemiologic Studies-Depression scale total score [17, 18, 22]. Prior studies found that all four health-related factors were linked to an increased risk of mortality, lower quality of sleep, and a higher incidence of dementia [26, 28–31]. With the exception of unchangeable elements like sex and race, any other socio-demographic, lifestyle, and health traits that were assessed in 2006 were regarded as confounding variables [17, 18, 22]. Moreover, to increase the sample size, these components underwent multiple imputation [17, 18, 22].

### **Statistical methods**

Through the use of Stata 18.0 (StataCorp, College Station, TX, USA), [32] our analyses took sampling design complexity into consideration through the inclusion of sampling weights, primary sampling units, and strata for most analyses. Aside from outcomes, covariates such as major exposures, mediators, and moderators were imputed through the use of chained equations when missing data were detected starting with the sample aged over 50 y in 2006 ( $n = 17,938$ ) [17, 18, 22, 33]. Missing data proportion in this sample was <2%, ranging from  $n = 0$  in 6 covariates to  $n = 185$  in one covariate out of a total of 13 imputed covariates. The main commands used to this end were `mi impute` followed by `mi passive` and `mi estimate`, as well as `mi svyset` and `mi stset` [18, 34]. Detailed code is provided on [https://github.com/baydounm/HRS\\_SLEEP\\_DEMENTI\\_A\\_MORTALITY\\_SUPPLEMENT](https://github.com/baydounm/HRS_SLEEP_DEMENTI_A_MORTALITY_SUPPLEMENT). We further utilized survey (`svy`) commands to estimate population proportions, means, in addition to regression coefficients, while standard errors (SE) were adjusted through Taylor

series linearization [17]. Analyses were performed in aggregate, and stratification was further performed by sex and race [18]. The `svy:reg` and `svy:mlogit` commands were used for comparisons of means and proportions of key measures by sex and race groups, using sex and racial contrasts as the sole predictors in these models [18].

We established the time-to-event (measured in years) starting from the age of entrance being greater than 50 years (referred to as delayed entry) and continuing until the exit age when either the event of interest (all-cause deaths) or censoring (loss to follow-up or termination of follow-up) took place [17, 18]. Loss to follow-up refers to the situation where a respondent, who was alive and participated in the previous wave, does not take part in a subsequent wave [17, 18]. The time variable utilized in the analysis was the number of years between the estimated age by the end of 2006 and the estimated event or censoring age [17, 18]. Only participants who were living in 2006 were included in the final analysis [17, 18]. Survival curves using the Kaplan-Meier method were implemented for different levels of poor sleep quality and different groups based on dementia status [17, 18]. The equality of survivor functions was assessed between groups using a log-rank test (specifically, the `sts` test with the `logrank` option) [17, 18].

In order to evaluate our main assumptions, we conducted Cox proportional hazards models for mortality risk [17, 18]. These models were stratified by race and sex, and were performed on imputed data. The models included socio-demographic, SES, lifestyle, and health-related variables. Two models were used: a reduced model (Model 1) and a fully adjusted model (Model 2) [17, 18]. The proportionality of the risks assumption was checked for each model. Hazard ratios, together with associated standard errors, were computed using multiple imputed data. Model 1 consisted of age in 2006, sex, and race as independent variables. Model 2 included additional covariates to this simplified model, specifically education, total wealth, marital status, smoking status, physical exercise, self-rated health, body mass index categories, cardiometabolic risk groups, and continuous total CES-D score. The primary variables of interest in these models were the continuous measure of “poor sleep quality” and the “dementia probability” converted using the `Logeodds`, with odds being the `Pr/(1-Pr)` transformation, as applied to the Hurd, expert, and LASSO algorithms (Analysis A) [18]. The study additionally examined the variation in the impact of “poor sleep quality” and “`Loge(dementia odds)`” on the risk of death based on gender and race [18]. This was done by introducing interaction terms between these factors and gender or race, respectively [18]. An analogous analytical method was utilized to examine

the relationship between binary dementia status factors and sleep quality tertiles, which were the primary variables of interest in Analysis B [18]. An increase of one unit in the  $\text{Log}_e(\text{odds})$  of the dementia outcomes equates to a shift in the probability of dementia from 0% to 73% [18].

To examine the relationship between the likelihood of developing dementia and mortality risk based on sleep quality tertiles, further models were implemented. These models, referred to as the reduced model (Model 1) and the fully adjusted model (Model 2), followed a similar procedure as previously described. More precisely, each dementia exposure metric was individually included in Cox proportional hazards models to analyze the relationship with overall mortality. The analysis was stratified by sleep quality tertiles. The study additionally examined differentials across sleep quality across tertiles by including 2-way interaction terms with each alternative dementia exposure in the unstratified model. Each  $\text{Ln}(\text{odds})$  of dementia utilizing the Hurd, expert, and LASSO algorithms, was included as a potential mediator/moderator in the relationship between poor sleep quality and the risk of mortality from 2006 to 2020. This aspect of the analysis was likewise conducted on multiple imputed data, although the complexity of the sample design was not taken into consideration. This portion of the analysis aimed to analyze the impact of “poor sleep quality” on mortality risk, taking into account the potential interaction with a mediator. The analysis decomposed the overall effect into four distinct components: (i) the controlled direct effect (CDE), which represents the effect without mediation or interaction; (ii) the interaction referent (INTREF), which represents the effect of interaction alone without mediation; (iii) the mediated interaction (INTMED), which represents the effect of both mediation and interaction; and (iv) the pure indirect effect (PIE), which represents the effect of mediation without interaction, as was done elsewhere [6, 17, 18, 22, 34, 35]. This four-way decomposition consolidates approaches for comprehending the effects and the comparative constitution of those effects within the framework of the four previously mentioned components (Supplementary Method 3). Stata has just implemented this method, which enables the estimation of parametric or semi-parametric regression models with four-way decomposition. The Med4way command [36] (<https://github.com/anddis/med4way>) was utilized to examine the mediation and interaction of the overall impact of the “poor sleep quality” exposure on the all-cause mortality outcome. This analysis considered three transformed “dementia probability” measures as potential alternative mediator/moderator variables. Cox proportional hazards models were used for the outcome, and ordinary least squares regression models were used

for each mediator/moderator. The complete sample underwent a four-way decomposition, utilizing age in 2006, sex, and race as exogenous factors. Additionally, the decomposition was stratified by both sex and race. The complete model was also regarded as a sensitivity analysis. Additionally, a 4-way decomposition was performed to analyze the relationship between  $\text{Log}_e$  (dementia odds) and mortality risk (“dementia-mortality” analysis). This analysis involved examining the potential mediators of poor sleep quality, using the same analytical method as the “sleep-mortality” analysis. Exposures and mediators/moderators were normalized using a Z-score transformation in all four-way decomposition models. The significance level for all analyses was established at 0.05, which means that the probability of making a Type I error was set at 0.05. The significance level for Type I error in the analysis of 2-way interaction variables involving sex and race was established at 0.10 [37].

Additionally, several secondary and sensitivity studies were conducted. Initially, a different metric for sleep quality was used, which excluded the item related to the use of sleep medicines. The results of these studies are included in the supplemental materials available online. Additionally, we conducted a sub-analysis that examined the relationship between sleep quality measures and mortality, taking into account alcohol use as one of the factors considered. Furthermore, each item of the sleep quality score was recoded as follows: 1 = good sleep quality, 2 = medium sleep quality, and 3 = poor sleep quality. These recoded scores were then assessed against the outcomes of all-cause mortality and dementia status using Cox proportional hazards and logistic regression models, respectively. The analysis was performed on multiple-imputed data. Only bivariate models are shown for the final selected sample. Ultimately, the fully adjusted model underwent backward elimination to investigate the impact of various confounders on the link between poor sleep quality and mortality. This process aimed to find the most influential confounder(s) in this relationship. The primary Stata output and the results of the sensitivity analysis may be found at: (refer to [https://github.com/baydounm/HRS\\_SLEEP\\_DEMENTIA\\_MORTALITY\\_SUPPLEMENT](https://github.com/baydounm/HRS_SLEEP_DEMENTIA_MORTALITY_SUPPLEMENT)), and the general analytical approach was adopted in other recent studies [6, 17, 18, 22, 34, 35].

### Data availability

While the data are owned by the University of Michigan Ann Arbor and Health and Retirement Study (HRS) is public use data, this work is owned and funded by the National Institute on Aging at the NIH. Scripts used in this analysis will be

made available on a github repository: [https://github.com/baydounm/HRS\\_SLEEP\\_DEMENTIA\\_MORTALITY\\_SUPPLEMENT](https://github.com/baydounm/HRS_SLEEP_DEMENTIA_MORTALITY_SUPPLEMENT). For additional information please contact the corresponding author by e-mail contact at [baydounm@mail.nih.gov](mailto:baydounm@mail.nih.gov).

## RESULTS

According to Table 1, male and Black/Hispanic/Others selected participants were on average younger than their female and White counterparts. Generally, females had lower socio-economic status, in terms of lower educational attainment, belonging to lower income categories, and reporting non-working status. Moreover, females were more likely to be widowed compared to their male counterparts. On the other hand, females were more likely to be never smokers, to be in the normal BMI range, and less likely to report  $\geq 3$  cardio-metabolic factors, even though they were less physically active. Females had a higher CES-D score, on average compared to males, as well as a poorer sleep quality score, and higher algorithmically defined dementia probability and proportion. Notable racial differences were observed as well. In fact, Black/Hispanic/Others participants had lower socio-economic status, based on education, income and work status compared to their White counterparts. They were also more likely to be divorced/separated or widowed, with higher proportion of current smokers, and lower percentage reporting physical exercise  $> 1$  time/week. Black/Hispanic/Others individuals were more likely to be obese (30% vs. 21%) and had on average a higher CES-D total score, although they reported better sleep quality compared their White counterparts. Dementia probability was significantly greater among Black/Hispanic/Others compared to White participants. Mortality rate was significantly greater among males compared to females though differences by race were not detected.

Figure 1 displays the likelihood of survival based on sleep quality tertiles and dementia level, as calculated by the 3 algorithms. In general, there was an association detected between low sleep quality and an increased death rate, and a clear link was seen where the mortality rate increased with the severity of poor sleep quality. Furthermore, a robust association was found between the likely presence of dementia and mortality risk.

Table 2 presents Cox proportional hazards (PH) models, where the primary variable of interest is the continuous score for “poor sleep quality,” and the outcome is the risk of mortality. The table displays the adjusted  $\text{Log}_e$  of the hazard ratio ( $\text{Log}_e$  (HR)) along with associated standard errors (SEs), based on multiple imputed data. The Cox proportional hazards models showed that each unit increase in the “poor sleep quality” score

was linked with a hazard ratio (HR) of 1.02 (95% confidence interval: 1.01–1.04), with a  $p$ -value of less than 0.001. The analysis was adjusted for age, sex, and race/ethnicity. The observed association was exclusively found in older adult males and among older adults of White ethnicity, with a marked interaction effect based on race. However, after accounting for other characteristics such as socio-economic status, lifestyle, and health-related factors, the poor sleep score was found to have a negative relationship with the risk of mortality. The estimated hazard ratio (HR) was 0.97 (0.96–0.98) per unit increase, indicating a decrease in risk. This relationship was statistically significant with a  $p$ -value of less than 0.001. In the analysis where sleep quality tertile is included as the main factor (Analysis B), each increase in tertile of the “poor sleep quality” measure was found to be related with a 7% increase in the risk of mortality in the entire population, according to the reduced model. In the fully adjusted model, each tertile increase in the “poor sleep quality” score was shown to be associated with a 7% decrease in the risk of mortality. This association was mostly observed among older adult females and individuals from the Black/Hispanic/Others racial groupings. The statistical analysis showed significant interactions with sex and race ( $P < 0.05$ ). Hence, the correlation between inadequate sleep quality and the risk of mortality is intricate and varies among different models.

Table 2 also incorporates three distinct algorithms to calculate the likelihood of dementia. These estimates were subsequently inputted into a Cox PH model to assess the risk of all-cause mortality. The modeling approach used for the “poor sleep quality” exposures was identical. The likelihood of developing dementia (after  $\text{Log}_e$  transformation) was consistently linked to an increased risk of mortality, with the LASSO algorithm (reduced model) showing a maximum risk increase of 21%. Controlling for the other factors reduced the strength of the relationship between the  $\text{Ln}(\text{odds})$  of dementia and the risk of mortality for most algorithms, but the relationship still remained statistically significant. Racial disparities were found in the relationship between dementia and mortality in the comprehensive models. Among White adults, the association was more pronounced (e.g., HR = 1.17 for LASSO algorithm,  $p < 0.001$ ) compared to Black/Hispanic/Others adults (HR = 1.13 for LASSO algorithm,  $p < 0.001$ ), for each unit increase in the  $\text{Log}_e$  (odds of dementia). It should be noted that this increase corresponds to the probability of dementia moving from 0% to 73%. The study found that individuals with a probable dementia diagnosis, as determined by each algorithm, had a roughly two-fold higher risk of all-cause mortality in the reduced model. This association was still statistically significant in the full model,

**Table 1. Study sample characteristics: overall, by sex and by race/ethnicity groups: HRS 2006–2020<sup>a</sup>.**

|                                                                       | Overall          | Male             | Female           | White            | Black/Hispanic/<br>Others | P <sup>b</sup> <sub>sex</sub> | P <sup>b</sup> <sub>race</sub> |
|-----------------------------------------------------------------------|------------------|------------------|------------------|------------------|---------------------------|-------------------------------|--------------------------------|
|                                                                       | Mean ± SEM, %             |                               |                                |
| Unweighted <i>N</i>                                                   | <i>N</i> = 6,758 | <i>N</i> = 2,869 | <i>N</i> = 3,889 | <i>N</i> = 5,471 | <i>N</i> = 1,287          |                               |                                |
| <b>Sex, % male</b>                                                    | 41.2             | 100              | 0                | 41.7             | 38.1                      | n/a                           | 0.012                          |
| <b>Age (years), 2006</b>                                              | 78.1 ± 0.1       | 77.6 ± 0.1       | 78.5 ± 0.1       | 78.3 ± 0.1       | 77.3 ± 0.2                | <0.001                        | <0.001                         |
| <b>Race, % Black/Hispanic/<br/>Others</b>                             | 13.5             | 12.5             | 14.2             | 0                | 100                       | 0.012                         | n/a                            |
| <b>Education:</b>                                                     |                  |                  |                  |                  |                           |                               |                                |
| No degree                                                             | 25               | 25.7             | 24.5             | 20.1             | 56.4                      | <0.001                        | <0.001                         |
| General Educational<br>Development                                    | 3.9              | 4.8              | 3.2              | 3.8              | 4.4                       | <0.001                        | <0.001                         |
| High School graduate                                                  | 33.7             | 27               | 38.4             | 35.6             | 21.6                      | (Ref)                         | (Ref)                          |
| Some college                                                          | 19               | 17.4             | 20.1             | 20.2             | 11.3                      | 0.025                         | 0.44                           |
| College degree or higher                                              | 18.5             | 25.1             | 13.8             | 20.4             | 6.3                       | <0.001                        | <0.001                         |
| <b>Marital status:</b>                                                |                  |                  |                  |                  |                           |                               |                                |
| Never married                                                         | 2.5              | 2.5              | 2.5              | 2.3              | 4.1                       | <0.001                        | <0.001                         |
| Married/Partnered                                                     | 53.8             | 74.3             | 39.4             | 55.3             | 44.3                      | (Ref)                         | (Ref)                          |
| Separated/Divorced                                                    | 7.7              | 6                | 8.9              | 7                | 11.9                      | <0.001                        | <0.001                         |
| Widowed                                                               | 36               | 17.2             | 49.2             | 35.4             | 39.6                      | <0.001                        | <0.001                         |
| <b>Work status:</b>                                                   |                  |                  |                  |                  |                           |                               |                                |
| Not Working                                                           | 87.2             | 82.4             | 90.5             | 86.8             | 89.4                      | (Ref)                         | (Ref)                          |
| Working                                                               | 12.8             | 17.6             | 9.5              | 13.2             | 10.6                      | <0.001                        | 0.097                          |
| <b>Total wealth (\$):</b>                                             |                  |                  |                  |                  |                           |                               |                                |
| <25,000                                                               | 44.2             | 31.1             | 53.2             | 39.7             | 72.4                      | <0.001                        | <0.001                         |
| 25,000–124,999                                                        | 51               | 61.6             | 43.6             | 54.7             | 27.2                      | (Ref)                         | (Ref)                          |
| 125,000–299,999                                                       | 4                | 6                | 2.8              | 4.7              | 0.3                       | <0.001                        | <0.001                         |
| ≥300,000                                                              | 0.8              | 1.3              | 0.6              | 0.9              | 0.1                       | 0.001                         | <0.001                         |
| <b>Smoking status:</b>                                                |                  |                  |                  |                  |                           |                               |                                |
| Never smoker                                                          | 44.2             | 28.8             | 55               | 43.8             | 47.2                      | <0.001                        | 0.015                          |
| Past smoker                                                           | 48.6             | 64.1             | 37.8             | 49.3             | 44.6                      | (Ref)                         | (Ref)                          |
| Current smoker                                                        | 7.1              | 7.1              | 7.2              | 7                | 8.2                       | <0.001                        | 0.048                          |
| <b>Frequency of PE:</b>                                               |                  |                  |                  |                  |                           |                               |                                |
| Never                                                                 | 27.2             | 20               | 32.3             | 26.1             | 34.6                      | <0.001                        | <0.001                         |
| 1–4 times per month                                                   | 18.8             | 19.2             | 18.5             | 18.3             | 22                        | 0.002                         | <0.001                         |
| >1 times per week                                                     | 54               | 60.8             | 49.2             | 55.7             | 43.4                      | (Ref)                         | (Ref)                          |
| <b>Self-rated health:</b>                                             |                  |                  |                  |                  |                           |                               |                                |
| Excellent/very<br>good/good                                           | 67.4             | 68.1             | 66.8             | 70.5             | 47.4                      | (Ref)                         | (Ref)                          |
| Fair/poor                                                             | 32.6             | 31.9             | 33.2             | 29.5             | 52.6                      | 0.37                          | <0.001                         |
| <b>Body mass index (kg/m<sup>2</sup>):</b>                            |                  |                  |                  |                  |                           |                               |                                |
| <25                                                                   | 39.5             | 32.5             | 44.5             | 41               | 30.1                      | (Ref)                         | (Ref)                          |
| 25–<30                                                                | 38.1             | 45.7             | 32.8             | 37.9             | 39.6                      | <0.001                        | <0.001                         |
| ≥30                                                                   | 22.3             | 21.8             | 22.7             | 21.1             | 30.2                      | <0.001                        | <0.001                         |
| <b>Number of cardiometabolic factors and conditions <sup>c</sup>:</b> |                  |                  |                  |                  |                           |                               |                                |
| 0                                                                     | 24.9             | 23.5             | 25.9             | 25.5             | 21                        | 0.32                          | 0.004                          |
| 1–2                                                                   | 63.4             | 62.6             | 64               | 63               | 65.7                      | (Ref)                         | (Ref)                          |
| ≥3                                                                    | 11.7             | 14               | 10.1             | 11.5             | 13.3                      | <0.001                        | 0.28                           |
| <b>CES-D total score</b>                                              | 1.48 ± 0.03      | 1.18 ± 0.04      | 1.68 ± 0.04      | 1.40 ± 0.03      | 1.97 ± 0.07               | <0.001                        | <0.001                         |



**Mortality rate, 2006–2020**

|                                   |                     |                     |                     |                     |                     |        |        |
|-----------------------------------|---------------------|---------------------|---------------------|---------------------|---------------------|--------|--------|
| # deaths per 1000 P-Y with 95% CI | 73.8<br>(71.8–75.9) | 81.1<br>(77.8–84.6) | 68.9<br>(66.4–71.6) | 73.9<br>(71.7–76.3) | 73.3<br>(68.8–78.3) | n/a    | n/a    |
| <b>Poor sleep quality score</b>   | 2.78 ± 0.03         | 2.46 ± 0.05         | 3.01 ± 0.03         | 2.80 ± 0.03         | 2.66 ± 0.06         | <0.001 | <0.001 |
| <b>Dementia status, % yes</b>     |                     |                     |                     |                     |                     |        |        |
| Hurd                              | 14.2                | 12.8                | 15.3                | 13.5                | 19.3                | 0.013  | <0.001 |
| Expert                            | 14.9                | 12.6                | 16.5                | 13.8                | 21.7                | 0.001  | <0.001 |
| LASSO                             | 16                  | 13.8                | 17.5                | 14.8                | 23.9                | 0.001  | <0.001 |
| <b>Dementia probability</b>       |                     |                     |                     |                     |                     |        |        |
| Hurd                              | 0.1                 | 0.09                | 0.11                | 0.09                | 0.17                | 0.001  | <0.001 |
| Expert                            | 0.13                | 0.11                | 0.14                | 0.12                | 0.2                 | <0.001 | <0.001 |
| LASSO                             | 0.13                | 0.11                | 0.15                | 0.12                | 0.19                | <0.001 | <0.001 |

Abbreviations: HRS: Health and Retirement Study; PE: physical exercise; SEM: Standard Error of the Mean. <sup>a</sup>Values are means ± SE or % ± SE, overall and across sex or race/ethnicity groups for main baseline and fixed sample characteristics (see Covariates section for detail), taking into account sampling weights and sampling design complexity in multiple imputed data. All covariates are measured in 2006 unless stated otherwise. <sup>b</sup>Based on linear or multinomial logit models with sex or race as the only predictors of continuous and categorical variables, respectively, accounting for sampling weights and sampling design complexity in multiple imputed data. (Ref) is included to show which category (the one with the largest sample) was used as the referent in the multinomial logistic regression models. <sup>c</sup>Number of chronic conditions among hypertension, diabetes, heart disease and stroke.

**Table 2. Poor sleep quality, dementia odds (Log<sub>e</sub> transformed) and all-cause mortality: Cox PH models, overall, by sex and by race, HRS 2006–2020<sup>a,e</sup>.**

|                                               | Overall                     | Male                        | Female                      | White                       | Black/Hispanic/Others       | P <sub>sex</sub> | P <sub>race</sub> |
|-----------------------------------------------|-----------------------------|-----------------------------|-----------------------------|-----------------------------|-----------------------------|------------------|-------------------|
|                                               | β ± SE                      |                  |                   |
| Unweighted N                                  | N = 6,718                   | N = 2,854                   | N = 3,864                   | N = 5,440                   | N = 1,278                   |                  |                   |
| <b>Analysis A</b>                             |                             |                             |                             |                             |                             |                  |                   |
| <b>Reduced models</b>                         |                             |                             |                             |                             |                             |                  |                   |
| <i>Model 1A:</i><br><i>Poor sleep quality</i> | +0.022 ± 0.007 <sup>c</sup> | +0.030 ± 0.010 <sup>c</sup> | +0.016 ± 0.009              | +0.026 ± 0.007 <sup>d</sup> | −0.009 ± 0.015              | 0.27             | <b>0.021</b>      |
| <i>Model 1B:</i><br><i>Hurd dementia</i>      | +0.085 ± 0.010 <sup>d</sup> | +0.103 ± 0.005 <sup>d</sup> | +0.082 ± 0.011 <sup>d</sup> | +0.086 ± 0.011 <sup>d</sup> | +0.082 ± 0.018 <sup>d</sup> | 0.17             | 0.59              |
| <i>Model 1C:</i><br><i>Expert dementia</i>    | +0.151 ± 0.009 <sup>d</sup> | +0.144 ± 0.005 <sup>d</sup> | +0.156 ± 0.010 <sup>d</sup> | +0.156 ± 0.009 <sup>d</sup> | +0.114 ± 0.014 <sup>d</sup> | 0.69             | <b>0.001</b>      |
| <i>Model 1D:</i><br><i>LASSO dementia</i>     | +0.194 ± 0.011 <sup>d</sup> | +0.180 ± 0.014 <sup>d</sup> | +0.207 ± 0.014 <sup>d</sup> | +0.197 ± 0.011 <sup>d</sup> | +0.174 ± 0.018 <sup>d</sup> | 0.84             | <b>0.028</b>      |
| Full models                                   | N = 6,368                   | N = 2,653                   | N = 3,715                   | N = 5,204                   | N = 1,164                   |                  |                   |
| <i>Model 2A:</i><br><i>Poor sleep quality</i> | −0.033 ± 0.009 <sup>c</sup> | −0.016 ± 0.013              | −0.044 ± 0.012 <sup>c</sup> | −0.030 ± 0.010 <sup>c</sup> | −0.057 ± 0.022 <sup>c</sup> | 0.099            | <b>0.032</b>      |
| <i>Model 2B:</i><br><i>Hurd dementia</i>      | +0.098 ± 0.010 <sup>d</sup> | +0.080 ± 0.015 <sup>d</sup> | +0.114 ± 0.012 <sup>d</sup> | +0.100 ± 0.011 <sup>d</sup> | +0.084 ± 0.017 <sup>d</sup> | 0.99             | <b>0.041</b>      |
| <i>Model 2C:</i><br><i>Expert dementia</i>    | +0.101 ± 0.009 <sup>d</sup> | +0.075 ± 0.013 <sup>d</sup> | +0.118 ± 0.011 <sup>d</sup> | +0.108 ± 0.009 <sup>d</sup> | +0.065 ± 0.016 <sup>d</sup> | 0.56             | <b>0.002</b>      |
| <i>Model 2D:</i><br><i>LASSO dementia</i>     | +0.150 ± 0.013 <sup>d</sup> | +0.121 ± 0.018 <sup>d</sup> | +0.172 ± 0.016 <sup>d</sup> | +0.153 ± 0.014 <sup>d</sup> | +0.125 ± 0.024 <sup>d</sup> | 0.74             | <b>0.048</b>      |
| <b>Analysis B</b>                             |                             |                             |                             |                             |                             |                  |                   |
| Reduced models                                | N = 6,718                   | N = 2,854                   | N = 3,864                   | N = 5,440                   | N = 1,278                   |                  |                   |
| <i>Model 1A:</i><br><i>Poor sleep quality</i> | +0.072 ± 0.023 <sup>c</sup> | +0.099 ± 0.034 <sup>c</sup> | +0.052 ± 0.028              | +0.088 ± 0.023 <sup>d</sup> | −0.026 ± 0.048              | 0.26             | <b>0.017</b>      |
| <i>Model 1B:</i><br><i>Hurd dementia</i>      | +0.675 ± 0.057 <sup>d</sup> | +0.674 ± 0.080 <sup>d</sup> | +0.684 ± 0.081 <sup>d</sup> | +0.706 ± 0.058 <sup>d</sup> | +0.563 ± 0.116 <sup>d</sup> | 0.73             | <b>0.012</b>      |
| <i>Model 1C:</i><br><i>Expert dementia</i>    | +0.731 ± 0.055 <sup>d</sup> | +0.716 ± 0.063 <sup>d</sup> | +0.743 ± 0.078 <sup>d</sup> | +0.745 ± 0.062 <sup>d</sup> | +0.673 ± 0.095 <sup>d</sup> | 0.90             | 0.16              |

|                                         |                                   |                                   |                                   |                                   |                                   |              |              |
|-----------------------------------------|-----------------------------------|-----------------------------------|-----------------------------------|-----------------------------------|-----------------------------------|--------------|--------------|
| <b>Model 1D:<br/>LASSO dementia</b>     | <b>+0.681 ± 0.058<sup>d</sup></b> | <b>+0.708 ± 0.069<sup>d</sup></b> | <b>+0.679 ± 0.083<sup>d</sup></b> | <b>+0.696 ± 0.064<sup>d</sup></b> | <b>+0.658 ± 0.092<sup>d</sup></b> | 0.36         | 0.069        |
| <b>Full models</b>                      | <i>N</i> = 6,368                  | <i>N</i> = 2,653                  | <i>N</i> = 3,715                  | <i>N</i> = 5,204                  | <i>N</i> = 1,164                  |              |              |
| <b>Model 2A:<br/>Poor sleep quality</b> | <b>-0.069 ± 0.027<sup>b</sup></b> | -0.011 ± 0.037                    | <b>-0.110 ± 0.033<sup>c</sup></b> | -0.056 ± 0.030                    | <b>-0.147 ± 0.067<sup>b</sup></b> | <b>0.036</b> | <b>0.037</b> |
| <b>Model 2B:<br/>Hurd dementia</b>      | <b>+0.400 ± 0.065<sup>d</sup></b> | <b>+0.304 ± 0.088<sup>d</sup></b> | <b>+0.461 ± 0.088<sup>d</sup></b> | <b>+0.428 ± 0.070<sup>d</sup></b> | <b>+0.300 ± 0.117<sup>b</sup></b> | 0.78         | 0.055        |
| <b>Model 2C:<br/>Expert dementia</b>    | <b>+0.457 ± 0.057<sup>d</sup></b> | <b>+0.369 ± 0.069<sup>d</sup></b> | <b>+0.510 ± 0.089<sup>d</sup></b> | <b>+0.474 ± 0.066<sup>d</sup></b> | <b>+0.422 ± 0.096<sup>d</sup></b> | 0.80         | 0.13         |
| <b>Model 2D:<br/>LASSO dementia</b>     | <b>+0.415 ± 0.067<sup>d</sup></b> | <b>+0.448 ± 0.073<sup>d</sup></b> | <b>+0.410 ± 0.097<sup>d</sup></b> | <b>+0.416 ± 0.077<sup>d</sup></b> | <b>+0.437 ± 0.102<sup>d</sup></b> | 0.26         | 0.37         |

Abbreviations: HRS: Health and Retirement Study; PH: Proportional hazards; SE: Standard Error. <sup>a</sup>Values are  $\beta \pm SE$ , with  $\beta$  representing  $\text{Log}_e\text{HR}$  from Cox PH model for each exposure-outcome relationship. Cox PH models were conducted overall and across sex or race/ethnicity groups, taking into account sampling weights and sampling design complexity in multiple imputed data. All covariates are measured in 2006 unless stated otherwise. Analysis A included continuous forms of dementia probability ( $\text{Log}_e$  (odds of dementia)) and continuous “poor sleep quality” score; while Analysis B included binary dementia status (3 algorithms) and “poor sleep quality tertile”. <sup>b</sup> $P < 0.05$ ; <sup>c</sup> $P < 0.010$ ; <sup>d</sup> $P < 0.001$  for null hypothesis that  $\beta = 0$ . <sup>e</sup>Reduced models (Models 1A–1D) were adjusted for age at 2006, sex and race/ethnicity. Full models (Model 2A–2D) further adjusted the reduced model by all covariates described under the Covariates section, including socio-demographic, socio-economic, lifestyle and health-related factors.

although the magnitude of the risk was reduced to approximately  $\text{HR} = 1.5$ . There were no discernible differences based on sex or race.

Through a series of sensitivity studies conducted on the data shown in Table 2 (available at [https://github.com/baydounm/HRS\\_SLEEP\\_DEMENTIA\\_MORTALITY\\_SUPPLEMENT](https://github.com/baydounm/HRS_SLEEP_DEMENTIA_MORTALITY_SUPPLEMENT)), additional adjustments were made to the models by including alcohol as one of the factors. Despite these adjustments, the relationship between sleep quality and mortality did not undergo significant changes. Furthermore, according to a separate sensitivity analysis, removing the covariates that were already included in the entire model by backward exclusion indicated that the most significant possible confounding factors were self-rated health, the CES-D score, and cardiometabolic disorders. However, none of these characteristics alone were capable of counteracting the association between sleep quality and the risk of mortality. Ultimately, when the alternative measure of sleep quality was used, excluding the item on sleep drugs, the results were comparable to those obtained from the main sleep quality measure in this specific analysis.

Table 3 displays results from Cox PH models for the association between dementia odds ( $\text{Log}_e$  transformed) and mortality risk, stratifying by “poor sleep quality” score tertile. In the fully adjusted models, as well as the reduced models for the Expert and LASSO algorithms, dementia odds had a stronger association with mortality risk in the two lower tertiles of “poor sleep quality” score, and a markedly weaker association in the uppermost tertile. In the full model, a dose-response relationship was found for all 3 algorithms

( $P < 0.001$  for “poor sleep quality” score tertile by dementia odds ( $\text{Log}_e$  transformed) interaction).

Four-way decomposition of poor sleep quality’s total effect on mortality risk through dementia odds ( $\text{Log}_e$  transformed) is shown in Table 4. This modeling approach alternated between a reduced and a fully adjusted model and for all 3 algorithms. When Hurd dementia was considered, in the reduced model, the positive total effect of poor sleep on mortality consisted mainly of a CDE. For Expert algorithmically defined dementia as the mediator/moderator, the total effect consisted of all 4 components, with an apparent antagonistic interaction. There was a similar pattern observed for the LASSO algorithm. In the fully adjusted model, poor sleep quality was inversely related to mortality risk, with a significant PIE explaining around 18–20% of the total effect for all 3 algorithms. Nevertheless, for all 3 algorithms, INTMED explained another 5–8% of the total effect, suggesting an antagonistic interaction between poor sleep quality and dementia in relation to mortality risk. When sex and race-specific findings were examined, PIE in the full model was mainly significant among female and White adults, as were INTREF and INTMED for all 3 algorithms. Among Black/Hispanic/Others adults, the inverse association of poor sleep quality with mortality risk in the full model was mostly a CDE.

Four-way decomposition of dementia odds ( $\text{Log}_e$  transformed) total effect on mortality risk through poor sleep quality is shown in Table 5. As shown before, attenuation of the total effect was observed between reduced and full models, and in both cases, dementia odds were directly associated with mortality risk.

**Table 3. Dementia odds (Log<sub>e</sub> transformed) and all-cause mortality across sleep quality tertiles: Cox PH models, HRS 2006–2020<sup>a</sup>.**

|                                   | T1                          | T2                          | T3                          | P <sub>sleep</sub> <sup>f</sup> |
|-----------------------------------|-----------------------------|-----------------------------|-----------------------------|---------------------------------|
|                                   | β ± SE                      | β ± SE                      | β ± SE                      |                                 |
| <b>Analysis A</b>                 |                             |                             |                             |                                 |
| Unweighted N                      | N = 2,286                   | N = 3,055                   | N = 1,377                   |                                 |
| <b>Reduced models<sup>e</sup></b> |                             |                             |                             |                                 |
| <i>Model 1A: Hurd dementia</i>    | +0.082 ± 0.012 <sup>d</sup> | +0.090 ± 0.018 <sup>d</sup> | +0.080 ± 0.015 <sup>d</sup> | 0.37                            |
| <i>Model 1B: Expert dementia</i>  | +0.158 ± 0.016 <sup>d</sup> | +0.153 ± 0.010 <sup>d</sup> | +0.132 ± 0.016 <sup>d</sup> | <b>0.018</b>                    |
| <i>Model 1C: LASSO dementia</i>   | +0.204 ± 0.018 <sup>d</sup> | +0.200 ± 0.015 <sup>d</sup> | +0.164 ± 0.019 <sup>d</sup> | <b>0.009</b>                    |
| <b>Full models<sup>e</sup></b>    |                             |                             |                             |                                 |
| Unweighted N                      | N = 2,146                   | N = 2,930                   | N = 1,292                   |                                 |
| <i>Model 2A: Hurd dementia</i>    | +0.119 ± 0.016 <sup>d</sup> | +0.097 ± 0.013 <sup>d</sup> | +0.066 ± 0.019 <sup>c</sup> | <0.001                          |
| <i>Model 2B: Expert dementia</i>  | +0.122 ± 0.015 <sup>d</sup> | +0.093 ± 0.012 <sup>d</sup> | +0.081 ± 0.019 <sup>d</sup> | <0.001                          |
| <i>Model 2C: LASSO dementia</i>   | +0.173 ± 0.020 <sup>d</sup> | +0.144 ± 0.017 <sup>d</sup> | +0.122 ± 0.028 <sup>d</sup> | <0.001                          |
| <b>Analysis B</b>                 |                             |                             |                             |                                 |
| Unweighted N                      | N = 2,286                   | N = 3,055                   | N = 1,377                   |                                 |
| <b>Reduced models<sup>e</sup></b> |                             |                             |                             |                                 |
| <i>Model 1A: Hurd dementia</i>    | +0.801 ± 0.101 <sup>d</sup> | +0.673 ± 0.068 <sup>d</sup> | +0.505 ± 0.117 <sup>d</sup> | <b>0.003</b>                    |
| <i>Model 1B: Expert dementia</i>  | +0.836 ± 0.094 <sup>d</sup> | +0.746 ± 0.081 <sup>d</sup> | +0.557 ± 0.107 <sup>d</sup> | <b>0.003</b>                    |
| <i>Model 1C: LASSO dementia</i>   | +0.717 ± 0.097 <sup>d</sup> | +0.767 ± 0.083 <sup>d</sup> | +0.479 ± 0.103 <sup>d</sup> | <b>0.014</b>                    |
| <b>Full models<sup>e</sup></b>    |                             |                             |                             |                                 |
| <i>Model 2A: Hurd dementia</i>    | +0.574 ± 0.097 <sup>d</sup> | +0.397 ± 0.070 <sup>d</sup> | +0.195 ± 0.136              | <b>0.001</b>                    |
| <i>Model 2B: Expert dementia</i>  | +0.649 ± 0.077 <sup>d</sup> | +0.409 ± 0.097 <sup>d</sup> | +0.291 ± 0.123 <sup>b</sup> | <b>0.001</b>                    |
| <i>Model 2C: LASSO dementia</i>   | +0.559 ± 0.086 <sup>d</sup> | +0.483 ± 0.081 <sup>d</sup> | +0.136 ± 0.130              | <b>0.001</b>                    |

Abbreviations: HRS: Health and Retirement Study; PH: Proportional hazards; SE: Standard Error. <sup>a</sup>Values are β ± SE, with β representing Log<sub>e</sub> (HR) from Cox PH model for each exposure-outcome relationship. Cox PH models were conducted overall and across sex or race/ethnicity groups, accounting for sampling weights and sampling design complexity in multiple imputed data. All covariates are measured in 2006 unless stated otherwise. Analysis A included continuous forms of dementia probability (Log<sub>e</sub> (odds of dementia)); while Analysis B included binary dementia status (3 algorithms). T1 corresponded to the first tertile of the “poor sleep quality” score (Mean ± SD: 0.49 ± 0.50, range: 0–1); T2 corresponded to the second tertile: (Mean ± SD: 2.90 ± 0.81, range: 2–4); T3 corresponded to the third tertile (Mean ± SD: 6.13 ± 1.19, range: 5–9). <sup>b</sup>P < 0.05; <sup>c</sup>P < 0.010; <sup>d</sup>P < 0.001 for null hypothesis that β = 0. <sup>e</sup>Reduced models (Models 1A–1C) were adjusted for age at 2006, sex and race/ethnicity. Full models (Model 2A–2C) further adjusted the reduced model by all covariates described under the Covariates section, including socio-demographic, socio-economic, lifestyle and health-related factors. <sup>f</sup>P-value associated with 2-way interaction term between poor sleep quality tertile and the main exposure dementia odds (Log<sub>e</sub> transformed), in a model not stratified by “poor sleep quality” tertile.

**Table 4. Poor sleep quality and all-cause mortality: four-way decomposition models by dementia odds (Log<sub>e</sub> transformed), overall, by sex and by race, HRS 2006–2020<sup>a,b</sup>.**

|                                                        | TE             |              | CDE            |              | INTREF         |              | INTMED          |              | PIE              |              |
|--------------------------------------------------------|----------------|--------------|----------------|--------------|----------------|--------------|-----------------|--------------|------------------|--------------|
| Y: All-cause mortality;<br>X: Poor sleep quality score | β ± SE         | P            | β ± SE         | P            | β ± SE         | P            | β ± SE          | P            | β ± SE           | P            |
| <b>Overall</b>                                         |                |              |                |              |                |              |                 |              |                  |              |
| <b>Reduced Model 1A–1C (N = 6,991)</b>                 |                |              |                |              |                |              |                 |              |                  |              |
| M: Hurd                                                | +0.041 ± 0.015 | <b>0.007</b> | +0.038 ± 0.015 | <b>0.010</b> | -0.001 ± 0.003 | 0.81         | +0.000 ± 0.0002 | 0.83         | +0.0041 ± 0.0034 | 0.24         |
| M: Expert                                              | +0.033 ± 0.015 | <b>0.035</b> | 0.031 ± 0.014  | <b>0.030</b> | -0.014 ± 0.004 | <b>0.001</b> | -0.002 ± 0.001  | <b>0.030</b> | +0.017 ± 0.005   | <0.001       |
| M: LASSO                                               | +0.032 ± 0.015 | <b>0.036</b> | +0.036 ± 0.014 | <b>0.010</b> | -0.011 ± 0.004 | <b>0.005</b> | -0.001 ± 0.000  | 0.19         | +0.008 ± 0.005   | <b>0.096</b> |

**Full model 2A–2C; (N = 6,510)**

|           |                  |        |                    |        |                    |       |                    |        |                    |        |
|-----------|------------------|--------|--------------------|--------|--------------------|-------|--------------------|--------|--------------------|--------|
| M: Hurd   | -0.0654 ± 0.0161 | <0.001 | -0.06400 ± 0.01642 | <0.001 | +0.00553 ± 0.00175 | 0.002 | +0.00363 ± 0.00114 | 0.001  | -0.01054 ± 0.00295 | <0.001 |
| M: Expert | -0.0667 ± 0.0161 | <0.001 | -0.05895 ± 0.01636 | <0.001 | +0.00079 ± 0.00135 | 0.53  | +0.00391 ± 0.00111 | <0.001 | -0.01249 ± 0.00304 | <0.001 |
| M: LASSO  | -0.0684 ± 0.0161 | <0.001 | -0.05959 ± 0.01641 | <0.001 | +0.00226 ± 0.00139 | 0.094 | +0.00442 ± 0.00116 | <0.001 | -0.01547 ± 0.00330 | <0.001 |

**Male**

**Reduced Model 1A–1C (N = 2,931)**

|           |                    |       |                    |       |                    |       |                    |       |                    |        |
|-----------|--------------------|-------|--------------------|-------|--------------------|-------|--------------------|-------|--------------------|--------|
| M: Hurd   | +0.04174 ± 0.02375 | 0.079 | +0.04182 ± 0.02267 | 0.065 | -0.01249 ± 0.00387 | 0.001 | -0.00226 ± 0.00128 | 0.079 | +0.01467 ± 0.00625 | 0.019  |
| M: Expert | +0.04685 ± 0.02408 | 0.052 | +0.03150 ± 0.02261 | 0.16  | -0.00721 ± 0.00462 | 0.12  | -0.00170 ± 0.00153 | 0.26  | +0.02426 ± 0.00687 | <0.001 |
| M: LASSO  | +0.04592 ± 0.02394 | 0.055 | +0.03582 ± 0.02277 | 0.12  | -0.00741 ± 0.00347 | 0.032 | -0.00165 ± 0.00125 | 0.19  | +0.01917 ± 0.00691 | 0.006  |

**Full model 2A–2C (N = 2,698)**

|           |                    |       |                    |       |                    |       |                    |       |                    |       |
|-----------|--------------------|-------|--------------------|-------|--------------------|-------|--------------------|-------|--------------------|-------|
| M: Hurd   | -0.04648 ± 0.02552 | 0.069 | -0.05095 ± 0.02573 | 0.048 | +0.00721 ± 0.0030  | 0.018 | +0.00173 ± 0.00141 | 0.22  | -0.00447 ± 0.00348 | 0.20  |
| M: Expert | -0.04624 ± 0.02559 | 0.071 | -0.04757 ± 0.02574 | 0.065 | +0.00535 ± 0.00258 | 0.038 | +0.00215 ± 0.00129 | 0.096 | -0.00447 ± 0.00348 | 0.20  |
| M: LASSO  | -0.04828 ± 0.02547 | 0.058 | -0.05299 ± 0.02632 | 0.044 | +0.01054 ± 0.00426 | 0.013 | +0.00204 ± 0.00124 | 0.10  | -0.00786 ± 0.00398 | 0.048 |

**Female**

**Reduced Model 1A–1C (N = 4,060)**

|           |                    |       |                     |       |                    |       |                    |      |                    |       |
|-----------|--------------------|-------|---------------------|-------|--------------------|-------|--------------------|------|--------------------|-------|
| M: Hurd   | +0.03516 ± 0.02026 | 0.083 | +0.03029 ± 0.01894  | 0.11  | +0.00402 ± 0.00469 | 0.39  | +0.00005 ± 0.00027 | 0.86 | +0.00081 ± 0.00459 | 0.86  |
| M: Expert | +0.02303 ± 0.02030 | 0.26  | +0.029170 ± 0.01832 | 0.11  | -0.01868 ± 0.00636 | 0.003 | -0.00147 ± 0.00091 | 0.11 | 0.01401 ± 0.00678  | 0.039 |
| M: LASSO  | +0.02335 ± 0.02028 | 0.25  | +0.03486 ± 0.01820  | 0.055 | -0.01336 ± 0.00697 | 0.055 | -0.00013 ± 0.00044 | 0.76 | +0.00198 ± 0.00644 | 0.76  |

**Full model 2A–2C (N = 3,812)**

|           |                    |        |                    |       |                    |       |                    |        |                    |        |
|-----------|--------------------|--------|--------------------|-------|--------------------|-------|--------------------|--------|--------------------|--------|
| M: Hurd   | -0.07924 ± 0.02084 | <0.001 | -0.07305 ± 0.02132 | 0.001 | +0.00380 ± 0.00223 | 0.088 | +0.00489 ± 0.00169 | 0.004  | -0.01488 ± 0.00446 | 0.001  |
| M: Expert | -0.08221 ± 0.02080 | 0.001  | -0.06579 ± 0.02109 | 0.002 | -0.00454 ± 0.00218 | 0.037 | +0.00556 ± 0.00175 | 0.001  | -0.01743 ± 0.00480 | 0.001  |
| M: LASSO  | -0.08393 ± 0.02072 | <0.001 | -0.06101 ± 0.02096 | 0.004 | -0.00801 ± 0.00237 | 0.001 | +0.00657 ± 0.00185 | <0.001 | -0.02148 ± 0.00499 | <0.001 |

**White**

**Reduced Model 1A–1C (N = 5,666)**

|           |                    |       |                    |       |                    |       |                    |      |                    |       |
|-----------|--------------------|-------|--------------------|-------|--------------------|-------|--------------------|------|--------------------|-------|
| M: Hurd   | +0.05311 ± 0.01733 | 0.002 | +0.05371 ± 0.01668 | 0.001 | -0.00020 ± 0.00257 | 0.94  | -0.00001 ± 0.00013 | 0.92 | -0.00039 ± 0.00383 | 0.92  |
| M: Expert | +0.04577 ± 0.01742 | 0.009 | +0.04676 ± 0.01627 | 0.004 | -0.00948 ± 0.00365 | 0.009 | -0.00055 ± 0.00047 | 0.25 | +0.00904 ± 0.00547 | 0.098 |
| M: LASSO  | +0.04335 ± 0.01728 | 0.012 | +0.05197 ± 0.01625 | 0.001 | -0.00933 ± 0.00367 | 0.011 | -0.00005 ± 0.00031 | 0.89 | 0.00075 ± 0.00523  | 0.89  |

**Full model 2A–2C (N = 5,324)**

|           |                    |       |                    |       |                    |        |                    |        |                    |        |
|-----------|--------------------|-------|--------------------|-------|--------------------|--------|--------------------|--------|--------------------|--------|
| M: Hurd   | -0.04948 ± 0.01799 | 0.006 | -0.05492 ± 0.01857 | 0.003 | +0.01331 ± 0.00308 | <0.001 | +0.00411 ± 0.00132 | 0.002  | -0.01197 ± 0.00339 | <0.001 |
| M: Expert | -0.05117 ± 0.01799 | 0.004 | -0.04568 ± 0.01847 | 0.013 | +0.00634 ± 0.00200 | 0.001  | +0.00515 ± 0.00136 | <0.001 | -0.01698 ± 0.00366 | <0.001 |
| M: LASSO  | -0.05237 ± 0.01791 | 0.003 | -0.04696 ± 0.01853 | 0.011 | +0.00781 ± 0.00224 | <0.001 | +0.00567 ± 0.00143 | <0.001 | -0.01888 ± 0.00384 | <0.001 |

**Black/Hispanic/Others**

**Reduced Model 1A–1C (N = 1,325)**

|           |                    |      |                    |      |                    |       |                    |      |                    |        |
|-----------|--------------------|------|--------------------|------|--------------------|-------|--------------------|------|--------------------|--------|
| M: Hurd   | -0.00793 ± 0.03387 | 0.82 | -0.02466 ± 0.03107 | 0.43 | -0.00388 ± 0.01139 | 0.73  | -0.00068 ± 0.00175 | 0.70 | 0.02129 ± 0.00785  | 0.007  |
| M: Expert | -0.01939 ± 0.03425 | 0.57 | -0.02685 ± 0.03152 | 0.39 | -0.02899 ± 0.01722 | 0.092 | -0.00688 ± 0.00426 | 0.11 | +0.04332 ± 0.01079 | <0.001 |
| M: LASSO  | -0.01300 ± 0.03459 | 0.71 | -0.02891 ± 0.03043 | 0.34 | -0.01620 ± 0.01634 | 0.32  | -0.00313 ± 0.00310 | 0.31 | +0.03524 ± 0.01061 | 0.001  |

**Full model 2A–2C (N = 1,186)**

|           |                    |        |                    |        |                    |      |                    |      |                    |      |
|-----------|--------------------|--------|--------------------|--------|--------------------|------|--------------------|------|--------------------|------|
| M: Hurd   | -0.13082 ± 0.03743 | <0.001 | -0.11055 ± 0.03785 | <0.001 | -0.01620 ± 0.01051 | 0.12 | +0.00149 ± 0.00175 | 0.39 | -0.00556 ± 0.00571 | 0.33 |
| M: Expert | -0.13009 ± 0.03742 | 0.001  | -0.11917 ± 0.03778 | 0.002  | -0.01013 ± 0.00868 | 0.24 | +0.00024 ± 0.00116 | 0.84 | -0.00103 ± 0.00490 | 0.84 |
| M: LASSO  | -0.13380 ± 0.03736 | <0.001 | -0.12390 ± 0.03678 | 0.001  | -0.00588 ± 0.00867 | 0.50 | +0.00059 ± 0.00103 | 0.57 | -0.00462 ± 0.00626 | 0.46 |

Abbreviations: CDE: Controlled Direct Effect; HRS: Health and Retirement Study; INTMED: Mediated Interaction; INTREF: Interaction Referent; PIE: Pure Indirect Effect; SE: Standard Error. <sup>a</sup>Cox PH regression models with mortality as the main outcome and poor sleep quality as the exposure. Log<sub>e</sub>(odds (dementia probability)) using Hurd, expert and LASSO algorithms were potential mediators/moderators allowed to interact with the main exposure, four-way decomposition analysis. 1 SD of the “poor sleep quality score” corresponded to 2.18 point higher score. 1 SD of Hurd, expert and LASSO algorithm Log<sub>e</sub>(dementia probability) corresponded to 3.93, 3.13 and 2.40, respectively. <sup>b</sup>Exogenous variables are the ones included in Table 2, Models 1A–1D and 2A–2D, as covariates for the reduced and full models, respectively. See Covariates section for detail.

This total effect in the reduced model was largely due to a controlled direct effect. In the full model, around 5–8% of the total effect was due to INTREF or INTMED, while a smaller portion was due to PIE (~1–2%). These patterns were mostly observed among

White participants, while among Black/Hispanic/Others individuals, the TE was mostly a CDE in the fully adjusted model. These patterns were detected for all 3 algorithms. In a sensitivity analysis whereby the sleep quality measure was replaced with one that excluded the

**Table 5. Dementia odds (Log<sub>e</sub> transformed) and all-cause mortality: four-way decomposition models by poor sleep quality, overall, by sex and by race: HRS 2006–2020<sup>a,b</sup>.**

|                                                        | TE                       |          | CDE                       |          | INTREF                     |              | INTMED                    |              | PIE                       |              |
|--------------------------------------------------------|--------------------------|----------|---------------------------|----------|----------------------------|--------------|---------------------------|--------------|---------------------------|--------------|
| Y: All-cause mortality;<br>M: Poor sleep quality score | $\beta \pm SE$           | <i>P</i> | $\beta \pm SE$            | <i>P</i> | $\beta \pm SE$             | <i>P</i>     | $\beta \pm SE$            | <i>P</i>     | $\beta \pm SE$            | <i>P</i>     |
| <b>Overall</b>                                         |                          |          |                           |          |                            |              |                           |              |                           |              |
| <b>Reduced Model 1A–1C (N = 6,991)</b>                 |                          |          |                           |          |                            |              |                           |              |                           |              |
| X: Hurd                                                | +0.39525 ± 0.01906       | <0.001   | +0.39470 ± 0.01884        | <0.001   | -0.00014 ± 0.00049         | 0.78         | +0.00004 ± 0.00028        | 0.88         | +0.00064 ± 0.00059        | 0.28         |
| X: Expert                                              | <b>0.62033 ± 0.02985</b> | <0.001   | <b>+0.62222 ± 0.02984</b> | <0.001   | -0.00023 ± 0.00121         | 0.85         | <b>-0.00339 ± 0.00154</b> | <b>0.028</b> | <b>+0.00172 ± 0.00092</b> | <b>0.061</b> |
| X: LASSO                                               | <b>0.58242 ± 0.02680</b> | <0.001   | <b>+0.58335 ± 0.02676</b> | <0.001   | -0.00070 ± 0.00089         | 0.43         | -0.00115 ± 0.00086        | 0.18         | +0.00092 ± 0.00065        | 0.16         |
| <b>Full model 2A–2C (N = 6,510)</b>                    |                          |          |                           |          |                            |              |                           |              |                           |              |
| X: Hurd                                                | +0.50781 ± 0.04782       | <0.001   | +0.46837 ± 0.04583        | <0.001   | <b>+0.01866 ± 0.00609</b>  | <b>0.002</b> | <b>+0.01585 ± 0.00517</b> | <b>0.002</b> | <b>+0.00493 ± 0.00187</b> | <b>0.008</b> |
| X: Expert                                              | +0.38284 ± 0.03203       | <0.001   | +0.35900 ± 0.03112        | <0.001   | <b>+0.01024 ± 0.00345</b>  | <b>0.003</b> | <b>+0.00947 ± 0.00278</b> | <b>0.001</b> | <b>+0.00414 ± 0.00153</b> | <b>0.007</b> |
| X: LASSO                                               | +0.44570 ± 0.03455       | <0.001   | +0.41699 ± 0.03368        | <0.001   | <b>+0.01151 ± 0.00389</b>  | <b>0.003</b> | <b>+0.01224 ± 0.00335</b> | <0.001       | <b>+0.00496 ± 0.00174</b> | <b>0.004</b> |
| <b>Male</b>                                            |                          |          |                           |          |                            |              |                           |              |                           |              |
| <b>Reduced Model 1A–1C (N = 2,931)</b>                 |                          |          |                           |          |                            |              |                           |              |                           |              |
| X: Hurd                                                | +0.56784 ± 0.04557       | <0.001   | +0.55737 ± 0.04524        | <0.001   | <i>+0.01378 ± 0.00707</i>  | <i>0.051</i> | <i>-0.00581 ± 0.00328</i> | <i>0.076</i> | +0.00251 ± 0.00170        | 0.14         |
| X: Expert                                              | +0.60686 ± 0.05046       | <0.001   | +0.60202 ± 0.05059        | <0.001   | +0.00639 ± 0.00618         | 0.30         | -0.00446 ± 0.00385        | 0.24         | +0.00291 ± 0.00221        | 0.19         |
| X: LASSO                                               | +0.57377 ± 0.04415       | <0.001   | +0.56788 ± 0.04412        | <0.001   | +0.00730 ± 0.00583         | 0.21         | -0.00373 ± 0.00274        | 0.17         | +0.00233 ± 0.00167        | 0.16         |
| <b>Full model 2A–2C (N = 2,698)</b>                    |                          |          |                           |          |                            |              |                           |              |                           |              |
| X: Hurd                                                | +0.41642 ± 0.07246       | <0.001   | +0.36637 ± 0.06879        | <0.001   | <b>+0.03971 ± 0.01513</b>  | <b>0.009</b> | +0.00806 ± 0.00666        | 0.23         | +0.00228 ± 0.00210        | 0.28         |
| X: Expert                                              | +0.26959 ± 0.04759       | <0.001   | +0.24091 ± 0.04630        | <0.001   | <b>+0.02081 ± 0.00885</b>  | <b>0.019</b> | +0.00534 ± 0.00328        | 0.10         | +0.00254 ± 0.00189        | 0.18         |
| X: LASSO                                               | .3520528 ± .0514405      | <0.001   | .3215936 .0500869 ±       | <0.001   | <b>.0218936 ± .0099902</b> | <b>0.028</b> | .0057126 ± .003571        | 0.11         | .0028529 ± .0020199       | 0.16         |
| <b>Female</b>                                          |                          |          |                           |          |                            |              |                           |              |                           |              |
| <b>Reduced Model 1A–1C (N = 4,060)</b>                 |                          |          |                           |          |                            |              |                           |              |                           |              |
| X: Hurd                                                | +0.37651 ± 0.02293       | <0.001   | +0.37352 ± 0.02191        | <0.001   | +0.00283 ± 0.00294         | 0.34         | +0.00007 ± 0.00039        | 0.86         | +0.00009 ± 0.00054        | 0.86         |
| X: Expert                                              | +0.63482 ± 0.03735       | <0.001   | +0.64365 ± 0.03736        | <0.001   | <b>-0.00729 ± 0.00256</b>  | <b>0.004</b> | -0.00278 ± 0.00172        | 0.11         | +0.00123 ± 0.00096        | 0.20         |
| X: LASSO                                               | +0.60279 ± 0.03461       | <0.001   | +0.60793 ± 0.03429        | <0.001   | <i>-0.00511 ± 0.00281</i>  | <i>0.068</i> | -0.00024 ± 0.00080        | 0.76         | +0.00022 ± 0.00071        | 0.76         |
| <b>Full model 2A–2C (N = 3,812)</b>                    |                          |          |                           |          |                            |              |                           |              |                           |              |
| X: Hurd                                                | +0.56909 ± 0.06359       | <0.001   | +0.54232 ± 0.06188        | <0.001   | -0.00075 ± 0.00514         | 0.88         | <b>+0.02080 ± 0.00754</b> | <b>0.006</b> | <b>+0.00673 ± 0.00282</b> | <b>0.017</b> |
| X: Expert                                              | +0.46129 ± 0.04325       | <0.001   | <b>±0.44589 ± 0.04242</b> | <0.001   | -0.00320 ± 0.00340         | 0.35         | <b>+0.01338 ± 0.00440</b> | <b>0.002</b> | <b>+0.00522 ± 0.00223</b> | <b>0.019</b> |
| X=LASSO                                                | +0.51349 ± 0.04663       | <0.001   | +0.49309 ± 0.04586        | <0.001   | -0.00386 ± 0.00357         | 0.28         | <b>+0.01806 ± 0.00535</b> | <b>0.001</b> | <b>+0.00619 ± 0.00260</b> | <b>0.017</b> |
| <b>White</b>                                           |                          |          |                           |          |                            |              |                           |              |                           |              |
| <b>Reduced Model 1A–1C (N = 5,666)</b>                 |                          |          |                           |          |                            |              |                           |              |                           |              |
| X: Hurd                                                | +0.40191 ± 0.02179       | <0.001   | +0.40169 ± 0.02137        | <0.001   | +0.00032 ± 0.00128         | 0.81         | -0.00002 ± 0.00019        | 0.91         | -0.00008 ± 0.00083        | 0.92         |
| X: Expert                                              | +0.65884 ± 0.03420       | <0.001   | +0.66085 ± 0.03412        | <0.001   | <i>-0.00201 ± 0.00104</i>  | <i>0.053</i> | -0.00132 ± 0.00109        | 0.23         | +0.00132 ± 0.00091        | 0.15         |
| X: LASSO                                               | +0.59003 ± 0.02964       | <0.001   | +0.59204 ± 0.02956        | <0.001   | <b>-0.00203 ± 0.00100</b>  | <b>0.042</b> | -0.00009 ± 0.00065        | 0.89         | +0.00012 ± 0.00083        | 0.89         |
| <b>Full model 2A–2C (N = 5,324)</b>                    |                          |          |                           |          |                            |              |                           |              |                           |              |
| X: Hurd                                                | +0.52716 ± 0.05367       | <0.001   | +0.48794 ± 0.05143        | <0.001   | <b>+0.01634 ± 0.00657</b>  | <b>0.013</b> | <b>+0.01836 ± 0.00614</b> | <b>0.003</b> | <b>+0.00452 ± 0.00200</b> | <b>0.043</b> |
| X: Expert                                              | +0.43335 ± 0.03742       | <0.001   | +0.40639 ± 0.03639        | <0.001   | <b>+0.00910 ± 0.00388</b>  | <b>0.019</b> | <b>±0.01379 ± 0.00380</b> | <0.001       | <b>+0.00406 ± 0.00188</b> | <b>0.030</b> |
| X: LASSO                                               | +0.47401 ± 0.03910       | <0.001   | +0.44245 ± 0.03806        | <0.001   | <b>+0.01079 ± 0.00438</b>  | <b>0.014</b> | <b>+0.01629 ± 0.00431</b> | <0.001       | <b>+0.00448 ± 0.00201</b> | <b>0.026</b> |
| <b>Black/Hispanic/Others</b>                           |                          |          |                           |          |                            |              |                           |              |                           |              |
| <b>Reduced Model 1A–1C (N = 1,325)</b>                 |                          |          |                           |          |                            |              |                           |              |                           |              |
| X: Hurd                                                | +0.36174 ± 0.03989       | <0.001   | +0.36399 ± 0.04016        | <0.001   | +0.00134 ± 0.00387         | 0.73         | -0.00105 ± 0.00274        | 0.70         | -0.00254 ± 0.00336        | 0.45         |
| X: Expert                                              | +0.47987 ± 0.06066       | <0.001   | +0.48313 ± 0.06060        | <0.001   | +0.01265 ± 0.00903         | 0.16         | -0.01126 ± 0.00714        | 0.12         | -0.00465 ± 0.00564        | 0.41         |
| X: LASSO                                               | +0.53338 ± 0.06233       | <0.001   | +0.53659 ± 0.06229        | <0.001   | +0.00674 ± 0.00757         | 0.37         | -0.00578 ± 0.00582        | 0.32         | -0.00417 ± 0.00461        | 0.37         |

**Full model 2A–2C (N = 1,186)**

|           |                    |        |                    |        |                    |      |                    |      |                    |      |
|-----------|--------------------|--------|--------------------|--------|--------------------|------|--------------------|------|--------------------|------|
| X: Hurd   | +0.41028 ± 0.10579 | <0.001 | +0.37851 ± 0.10205 | <0.001 | +0.01963 ± 0.01694 | 0.25 | +0.00605 ± 0.00738 | 0.41 | +0.00608 ± 0.00652 | 0.35 |
| X: Expert | +0.22589 ± 0.06172 | <0.001 | +0.21525 ± 0.05966 | <0.001 | +0.00927 ± 0.00966 | 0.34 | +0.00042 ± 0.00205 | 0.84 | +0.00095 ± 0.00453 | 0.83 |
| X: LASSO  | +0.33939 ± 0.07511 | <0.001 | +0.32810 ± 0.07360 | <0.001 | +0.00591 ± 0.01086 | 0.59 | +0.00133 ± 0.00252 | 0.60 | +0.00405 ± 0.00560 | 0.47 |

Abbreviations: CDE: Controlled Direct Effect; HRS: Health and Retirement Study; INTMED: Mediated Interaction; INTREF: Interaction Referent; PIE: Pure Indirect Effect; SE: Standard Error. <sup>a</sup>Cox PH regression models with mortality as the main outcome and poor sleep quality as the potential mediator/moderator allowed to interact with the main exposure. Log<sub>e</sub> (odds (dementia probability)) using Hurd, expert and LASSO algorithms were the main alternative exposures of interest, sample size N = 6,991, four-way decomposition analysis. 1 SD of the “poor sleep quality score” corresponded to 2.18 point higher score. 1 SD of Hurd, expert and LASSO algorithm Log<sub>e</sub> (dementia probability) corresponded to 3.93, 3.13 and 2.40, respectively. <sup>b</sup>Exogenous variables are the ones included in Table 2, Models 1A–1D and 2A–2D, as covariates for the reduced and full models, respectively. See Covariates section for detail.

sleep medication item, results were not markedly altered. The findings are depicted in Supplementary Tables 1 and 2 and the full output provided on [https://github.com/baydounm/HRS\\_SLEEP\\_DEMENTIA\\_A\\_MORTALITY\\_SUPPLEMENT](https://github.com/baydounm/HRS_SLEEP_DEMENTIA_A_MORTALITY_SUPPLEMENT).

Furthermore, when each item was tested separately in relation to all-cause mortality and dementia status, some items were more predictive of each of these two outcomes than others. More specifically, there was a dose-response relationship between poor sleep based on “trouble falling asleep” and all-cause mortality (Poor vs. Good: HR = 1.17, *P* < 0.001; Medium vs. Good: HR = 0.95, *P* = 0.10), as was the case for “feeling rested in the morning” (Poor vs. Good: HR = 1.27, *P* < 0.001; Medium vs. Good: HR = 1.16, *P* < 0.001). Similarly, medication use for sleep was associated with increased risk for all-cause mortality (HR = 1.13, *P* < 0.001). In contrast, “trouble waking up during the night” was inversely related to dementia status based on all 3 algorithms unlike “trouble falling asleep” was, as expected, associated with greater risk for dementia particularly when comparing “Poor” with “Good” sleep quality. “Feeling rested in the morning” (“Poor vs. Good”, and “Medium vs. Good”) was associated with greater risk for dementia, for all 3 algorithms. No association was detected for the remaining items including medication use for sleep, with respect to dementia status. The full output for this sensitivity analysis can also be found on: [https://github.com/baydounm/HRS\\_SLEEP\\_DEMENTIA\\_MORTALITY\\_SUPPLEMENT](https://github.com/baydounm/HRS_SLEEP_DEMENTIA_MORTALITY_SUPPLEMENT).

## DISCUSSION

### Summary of findings

Our present study examines the bi-directional associations of sleep quality, dementia status and mortality in older adults residing in the US, by utilizing data from the Health and Retirement Study. It found that poor sleep quality was associated with increased all-cause mortality risk in males and among White older adults. The association was strongest among White adults, but attenuated in fully adjusted models. The study also detected a stronger positive association between dementia and mortality among individuals with better sleep quality. Four-way decomposition indicated

roles played by both mediation and interaction, though statistically significant total effects were mainly composed of controlled direct effects.

### Previous studies

#### *Sleep and mortality*

The current study’s findings of an association between sleep and mortality, particularly within males, aligns with some of these previous literature [38]. Specifically, one study observed insomnia and excessive daytime sleepiness strictly within older men was associated with an increased risk of mortality over 20 years even after accounting for other health conditions (e.g., cancer, depression, dementia) [38]. However, this observation is not entirely consistent with the prior evidence. For example, some prior studies have not observed a significant association between sleep and mortality risk but have observed an association between sleep and health outcomes (e.g., stroke, coronary heart disease) that increase mortality risk [39, 40]. Inconsistencies in the current work and prior findings can be attributed to differences in the age ranges of the included participants, sleep measures, and approach for measuring mortality. Despite the differences, our findings warrant further exploration of biopsychosocial factors that might influence the sleep and mortality association particularly within men.

There is a connection between sleep disturbance and increased systemic inflammation, which can cause damage to neurons and result in death [3, 41]. Research has investigated the correlation between sleep and several health conditions such as obesity, diabetes, heart disease, depression, cholesterol, and inflammation [3, 42]. We cannot make definitive judgments on the relationship between sleep quality and disorders and their ability to predict all-cause mortality due to the lack of sufficient evidence. A detailed review of prior studies is provided elsewhere [3]. Similarly, a study examining sleep behaviors and all-cause mortality rates in older adults using data from the NHANES, found a positive relationship between long sleep and mortality rates [3]. Sleepiness/disorder was positively associated with mortality rates in males, while poor sleep-related daytime dysfunction negatively affected mortality rates

in elderly individuals [3]. In our current investigation, while the exact duration of sleep was not evaluated, certain indicators of sleep quality were found to be more prognostic of overall mortality compared to others. These indicators include the use of medicine, difficulty in initiating sleep, and feeling unrefreshed in the morning. These findings require additional replication in other nationally representative cohorts, specifically among older persons.

### ***Dementia and mortality***

Impaired cognitive function assessed in the middle to late stages of life is associated with a higher likelihood of mortality, although the specific reasons for this relationship remain unclear. Cognitive function is primarily influenced by intricate interplay between environmental and genetic factors over the course of one's life, which can also impact health and lifespan [43, 44]. Deviation from normal cognitive performance may indicate underlying biological problems or hereditary variables that extend beyond neurodegenerative illnesses, as well as social and physical consequences [18, 45]. Significantly, a comprehensive analysis of over 60 research studies revealed that cognitive impairment, including obvious dementia, was linked to a higher likelihood of death from any cause [18, 46]. In contrast to previous investigations, the present study found that the link between dementia and mortality is most pronounced among White adults. This finding is consistent with a previous meta-analysis that examined multiple studies [46]. This observation is thought to be caused by methodological difficulties, such as the lack of representation of certain racial or ethnic groups who may not have access to health services for a dementia diagnosis. It could also be influenced by sociohistorical events or experiences, such as migration patterns, that are especially relevant to the lifespan of specific racial or ethnic groups [47]. Nevertheless, it is necessary to do further research in order to properly examine these potential causes.

### ***Sleep and dementia***

Recent research has found that both insufficient sleep (less than 6 hours) and excessive sleep (more than 9 hours) are linked to impaired cognitive performance and higher chances of Alzheimer's disease and dementias [15, 48]. Gildner and colleagues uncovered an association between prolonged sleep duration and decreases in total cognitive function, attention/working memory, and executive function [12, 15]. These findings have been corroborated with others as described in another recent study [15]. Importantly, the latter study involving 9518 US elderly participants in the HRS, found that severe insomnia symptoms increased the risk of memory problems and dementia diagnoses over a 10-year follow-up period [15].

According to a comprehensive meta-analysis, persons who reported having trouble sleeping had a higher risk of developing dementia, AD, and cerebrovascular disease [49]. Furthermore, there is a correlation between sleep disturbances, including sleep disordered breathing, and an increased occurrence of dementia, specifically AD and cerebrovascular disease [49]. Prior studies have also proposed that sleep disturbances could serve as an early indicator of cognitive dysfunction (e.g., [16]), or may share common risk factors, or conversely, may be associated with a greater risk of cognitive dysfunction or mortality due to medication usage. Therefore, further comprehensive investigations are necessary.

### **Interaction between sleep and cognition in relation to mortality risk**

Additional research has shown a relationship between the risk of death and cognition. For example, self-reported short sleep duration (HR: 1.03 (0.98–1.09)) and long sleep duration (HR: 1.13 (1.08–1.18)) were linked to higher risk of mortality, according to data from the Chinese Longitudinal Healthy Longevity Surveys [50]. In a stratified study based on physical disability, chronic diseases, and cognitive impairment, only those with MMSE scores  $\leq 24$  had a mortality risk (60). Long sleep and cognitive impairment had a statistically significant relationship with mortality (P for interaction = .002) [50]. A population-based, in-lab, longitudinal study from the Penn State Adult Cohort revealed that those who slept less than 6 hours at baseline had a significantly higher risk of mortality from all causes and mortality linked to potential vascular cognitive impairment ( $n = 122$ ) (HR = 1.79, 95% confidence interval (CI) = 1.28–2.51 and HR = 4.01, 95% CI = 2.66–6.05, respectively) [51]. Both of these studies suggest some synergism between poor sleep and poor cognition in relation to mortality risk. Those findings are in contrast with our present study, the latter showing that the association between dementia probability and mortality risk was mostly detected among individuals with better sleep quality. Thus, more studies are needed in order to come to a consensus with respect to interactions between sleep and cognition in relation to mortality risk, and whether these interactions differ across different age groups.

### **Heterogeneity by race**

In previous studies, compared to White adults, Black adults tend to report short (<7 hours) or long (>10 hours) durations of sleep, trouble falling asleep, worse sleep efficiency, and greater daytime sleepiness [52]. Moreover, sleep disorders (e.g., sleep apnea) tend to be highly prevalent among Black individuals [53]. Despite

the disproportionate risk of dementia [54] and mortality [55] observed in Black adults, we found that dementia was more strongly associated with mortality among White adults. However, the Case and Deaton (2017) paper illustrates that mortality rates increased in 2015 particularly for non-Hispanic White adults with lower education levels while mortality rates declined/remained stable for Black and Hispanic individuals during this time frame [55]. This observation brings up the possibility that the dementia and mortality association may be particularly strong among White adults with lower education levels. This might speak to further exploration of how socioeconomic heterogeneity among White adults might further elucidate the group of individuals that may be at risk. Other literature is reviewed in the Supplementary Materials under “Supplementary literature search and reviews”.

### Strengths and limitations

Our study has notable strengths. First, this is the first investigation to test the association of sleep and dementia with mortality risk, while also exploring bi-directional mediational effects. It is also the first to accomplish this by using a nationally representative study of older adults who were followed for up to 14 years [18]. The HRS contains a wealth of data, allowing us to test numerous hypotheses while accounting for the potential confounding effects of extraneous variables. The present study also made use of advanced techniques, including multiple imputations applied to covariates, survival methods such as Cox proportional hazards models accounting for sampling design complexity and four-way decomposition models to test both mediation and interaction simultaneously [18]. Nevertheless, our study has some notable limitations. First, although date of death was available, date of birth was only an estimate at the month and year precision level, adding some measurement error into the analysis [18]. Second, poor sleep quality was measured using a minimal set of questions that were not validated against other measures such as the full PSQI score or more objective measures such as those obtained from an accelerometer. Third, measurement error in the algorithmically defined dementia outcome could not be assessed, although some of these algorithms relied heavily on the extensive ADAMS sub-study [18]. Finally, we cannot rule out the role played by residual confounding and selection biases.

### CONCLUSIONS

In sum, poor sleep quality was only directly related to mortality risk before adjustment for lifestyle and health-related factors. Therefore, the potential causal effect of poor sleep quality on mortality risk appears

to be confounding by other lifestyle and health-related factors. Dementia was positively associated with mortality risk, particularly among individuals with better sleep quality, among males and among White older adults. Furthermore, individuals with normal sleep quality should be screened for cognitive performance over time as it may be a predictor for adverse future health outcomes, particularly men and White older adults. Future studies should uncover some of the underlying mechanisms behind the dementia-sleep antagonistic interactions.

### Abbreviations

AD: Alzheimer’s Disease; ADAMS: Aging, Demographics, and Memory Study; CES-D: Center for Epidemiologic Studies Depression Scale; CDE: Controlled Direct Effect; EFTF: Enhanced Face-to-Face; INTREF: Interaction Referent; INTMED: Mediated Interaction; HRS: Health Retirement Study; LASSO: Least Absolute Shrinkage and Selection Operator; OLS: Ordinary Least Squares; PH: Proportional Hazards; PIE: Pure Indirect Effect; Pr: Probability; PSU: Primary Sampling Unit; SE: Standard Errors; svy: Survey commands in Stata; TE: Total Effect.

### AUTHOR CONTRIBUTIONS

M.A.B.: Study concept, plan of analysis, data management, statistical analysis, literature search and review, write-up of the manuscript, revision of the manuscript; R.T.: Plan of analysis, assistance with statistical analysis; literature search and review, write-up of parts of the manuscript, revision of the manuscript; M.F.G.: Plan of analysis, literature search and review, write-up of parts of the manuscript, revision of the manuscript; C.A.M.V.: Plan of analysis, literature search and review, write-up of parts of the manuscript, revision of the manuscript; A.A.G.: Literature search and review, write-up of parts of the manuscript, revision of the manuscript. H.A.B.: Literature search and reviews, write-up of parts of the manuscript, revision of the manuscript. N.N.H.: Literature search and reviews, write-up of parts of the manuscript, revision of the manuscript. M.K.E.: Data acquisition, write-up of parts of the manuscript, revision of the manuscript; A.B.Z.: Data acquisition, write-up of parts of the manuscript, revision of the manuscript.

### ACKNOWLEDGMENTS

The authors would like to thank the HRS staff, investigators and participants and the NIA/NIH/IRP internal reviewers of this manuscript. Dr. Hind A. Beydoun worked on this manuscript outside her tour of duty at the U.S. Department of Veterans Affairs.



## CONFLICTS OF INTEREST

The authors declare no conflicts of interest related to this study. The views expressed in this article are those of the authors and do not necessarily reflect the official policy or position of the NIH, VA or U.S. Government. Reference to any commercial products within this publication does not create or imply any endorsement by NIH, VA or U.S. Government.

## ETHICAL STATEMENT AND CONSENT

The Institutional Review Board (IRB) at the University of Michigan, Ann Arbor (NIA U01 AG009740; URL: Institutional Review Board Information (umich.edu)) granted approval after the procedures were carried out in compliance with the institution or the regional committee on human experimentation's ethical standards. The ethics board found that there was no need for or waiver of participant consent. The National Institutes of Health's Intramural Research Program granted approval for the current retrospective analysis of the parent IRB-approved study, which was deemed to be research not involving human subjects.

## FUNDING

This work was supported in part by the Intramural Research Program of the NIH, National Institute on Aging, National Institutes of Health project number AG000513. Support for this work was partially provided by the National Institute on Aging (U01 AG072619-AG) and the South Carolina Alzheimer's Disease Research Center (AG).

## REFERENCES

1. Grimaldi M, Bacaro V, Natale V, Tonetti L, Crocetti E. The Longitudinal Interplay between Sleep, Anthropometric Indices, Eating Behaviors, and Nutritional Aspects: A Systematic Review and Meta-Analysis. *Nutrients*. 2023; 15:3179. <https://doi.org/10.3390/nu15143179> PMID:37513597
2. Dedhia RC, Strollo PJ, Soose RJ. Upper Airway Stimulation for Obstructive Sleep Apnea: Past, Present, and Future. *Sleep*. 2015; 38:899–906. <https://doi.org/10.5665/sleep.4736> PMID:25409109
3. Beydoun HA, Beydoun MA, Chen X, Chang JJ, Gamaldo AA, Eid SM, Zonderman AB. Sex and age differences in the associations between sleep behaviors and all-cause mortality in older adults: results from the National Health and Nutrition Examination Surveys. *Sleep Med*. 2017; 36:141–51.

<https://doi.org/10.1016/j.sleep.2017.05.006>

PMID:28735912

4. Beydoun MA, Beydoun HA, Gamaldo AA, Teel A, Zonderman AB, Wang Y. Epidemiologic studies of modifiable factors associated with cognition and dementia: systematic review and meta-analysis. *BMC Public Health*. 2014; 14:643. <https://doi.org/10.1186/1471-2458-14-643> PMID:24962204
5. Beydoun MA, Beydoun HA, Fanelli-Kuczmariski MT, Weiss J, Georgescu MF, Meirelles O, Lyall DM, Evans MK, Zonderman AB. Pathways explaining racial/ethnic and socio-economic disparities in dementia incidence: the UK Biobank study. *Aging (Albany NY)*. 2023; 15:9310–40. <https://doi.org/10.18632/aging.205058> PMID:37751591
6. Beydoun MA, Beydoun HA, Hu YH, Maino Vieytes CA, Noren Hooten N, Song M, Georgescu MF, Fanelli-Kuczmariski MT, Meirelles O, Launer LJ, Evans MK, Zonderman AB. Plasma proteomic biomarkers and the association between poor cardiovascular health and incident dementia: The UK Biobank study. *Brain Behav Immun*. 2024; 119:995–1007. <https://doi.org/10.1016/j.bbi.2024.05.005> PMID:38710337
7. Ferri CP, Prince M, Brayne C, Brodaty H, Fratiglioni L, Ganguli M, Hall K, Hasegawa K, Hendrie H, Huang Y, Jorm A, Mathers C, Menezes PR, et al, and Alzheimer's Disease International. Global prevalence of dementia: a Delphi consensus study. *Lancet*. 2005; 366:2112–7. [https://doi.org/10.1016/S0140-6736\(05\)67889-0](https://doi.org/10.1016/S0140-6736(05)67889-0) PMID:16360788
8. Prince M, Bryce R, Albanese E, Wimo A, Ribeiro W, Ferri CP. The global prevalence of dementia: a systematic review and metaanalysis. *Alzheimers Dement*. 2013; 9:63–75.e2. <https://doi.org/10.1016/j.jalz.2012.11.007> PMID:23305823
9. Sosa-Ortiz AL, Acosta-Castillo I, Prince MJ. Epidemiology of dementias and Alzheimer's disease. *Arch Med Res*. 2012; 43:600–8. <https://doi.org/10.1016/j.arcmed.2012.11.003> PMID:23159715
10. Wang MC, Li TC, Li CI, Liu CS, Lin CH, Lin WY, Yang CW, Yang SY, Lin CC. Cognitive function and its transitions in predicting all-cause mortality among urban community-dwelling older adults. *BMC Psychiatry*. 2020; 20:203. <https://doi.org/10.1186/s12888-020-02618-9> PMID:32375731

11. Hall MH, Smagula SF, Boudreau RM, Ayonayon HN, Goldman SE, Harris TB, Naydeck BL, Rubin SM, Samuelsson L, Satterfield S, Stone KL, Visser M, Newman AB. Association between sleep duration and mortality is mediated by markers of inflammation and health in older adults: the Health, Aging and Body Composition Study. *Sleep*. 2015; 38:189–95. <https://doi.org/10.5665/sleep.4394> PMID:25348127
12. Gildner TE, Salinas-Rodríguez A, Manrique-Espinoza B, Moreno-Tamayo K, Kowal P. Does poor sleep impair cognition during aging? Longitudinal associations between changes in sleep duration and cognitive performance among older Mexican adults. *Arch Gerontol Geriatr*. 2019; 83:161–8. <https://doi.org/10.1016/j.archger.2019.04.014> PMID:31059924
13. Choe YM, Byun MS, Yi D, Lee JH, Jeon SY, Sohn BK, Kim YK, Shin SA, Sohn CH, Lee YJ, Lee DY, and KBASE Research Group. Sleep experiences during different lifetime periods and in vivo Alzheimer pathologies. *Alzheimers Res Ther*. 2019; 11:79. <https://doi.org/10.1186/s13195-019-0536-6> PMID:31511066
14. Winkelman JW, Lecea L. Sleep and neuropsychiatric illness. *Neuropsychopharmacology*. 2020; 45:1–2. <https://doi.org/10.1038/s41386-019-0514-5> PMID:31486776
15. Beydoun HA, Beydoun MA, Weiss J, Hossain S, Huang S, Alemu BT, Zonderman AB. Insomnia as a predictor of diagnosed memory problems: 2006–2016 Health and Retirement Study. *Sleep Med*. 2021; 80:158–66. <https://doi.org/10.1016/j.sleep.2021.01.038> PMID:33601227
16. Postuma RB, Gagnon JF, Montplaisir J. Cognition in REM sleep behavior disorder - A window into preclinical dementia? *Sleep Med*. 2008; 9:341–2. <https://doi.org/10.1016/j.sleep.2007.08.001> PMID:17869575
17. Beydoun MA, Weiss J, Banerjee S, Beydoun HA, Noren Hooten N, Evans MK, Zonderman AB. Race, polygenic risk and their association with incident dementia among older US adults. *Brain Commun*. 2022; 4:fcac317. <https://doi.org/10.1093/braincomms/fcac317> PMID:36569604
18. Georgescu MF, Beydoun MA, Ashe J, Maino Vieytes CA, Beydoun HA, Evans MK, Zonderman AB. Loneliness, Dementia Status, and Their Association with All-Cause Mortality Among Older US Adults. *J Alzheimers Dis*. 2024; 99:753–72. <https://doi.org/10.3233/JAD-231359> PMID:38701144
19. McGrath R, Vincent BM, Hackney KJ, Robinson-Lane SG, Downer B, Clark BC. The Longitudinal Associations of Handgrip Strength and Cognitive Function in Aging Americans. *J Am Med Dir Assoc*. 2020; 21:634–9.e1. <https://doi.org/10.1016/j.jamda.2019.08.032> PMID:31706916
20. Hunter JC, Handing EP, Casanova R, Kuchibhatla M, Lutz MW, Saldana S, Plassman BL, Hayden KM. Neighborhoods, sleep quality, and cognitive decline: Does where you live and how well you sleep matter? *Alzheimers Dement*. 2018; 14:454–61. <https://doi.org/10.1016/j.jalz.2017.10.007> PMID:29396109
21. Weir DR. Validating mortality ascertainment in the health and retirement study. 2016. [https://hrs.isr.umich.edu/sites/default/files/biblio/Weir\\_mortality\\_ascertainment.pdf](https://hrs.isr.umich.edu/sites/default/files/biblio/Weir_mortality_ascertainment.pdf)
22. Beydoun MA, Hossain S, Chitrala KN, Tajuddin SM, Beydoun HA, Evans MK, Zonderman AB. Association between epigenetic age acceleration and depressive symptoms in a prospective cohort study of urban-dwelling adults. *J Affect Disord*. 2019; 257:64–73. <https://doi.org/10.1016/j.jad.2019.06.032> PMID:31299406
23. Wang AY, Hu HY, Ou YN, Wang ZT, Ma YH, Tan L, Yu JT. Socioeconomic Status and Risks of Cognitive Impairment and Dementia: A Systematic Review and Meta-Analysis of 39 Prospective Studies. *J Prev Alzheimers Dis*. 2023; 10:83–94. <https://doi.org/10.14283/jpad.2022.81> PMID:36641612
24. Stringhini S, Carmeli C, Jokela M, Avendaño M, Muennig P, Guida F, Ricceri F, d'Errico A, Barros H, Bochud M, Chadeau-Hyam M, Clavel-Chapelon F, Costa G, et al, and LIFEPAth consortium. Socioeconomic status and the 25 × 25 risk factors as determinants of premature mortality: a multicohort study and meta-analysis of 1.7 million men and women. *Lancet*. 2017; 389:1229–37. [https://doi.org/10.1016/S0140-6736\(16\)32380-7](https://doi.org/10.1016/S0140-6736(16)32380-7) PMID:28159391
25. Barragán R, Ortega-Azorín C, Sorlí JV, Asensio EM, Coltell O, St-Onge MP, Portolés O, Corella D. Effect of Physical Activity, Smoking, and Sleep on Telomere Length: A Systematic Review of Observational and Intervention Studies. *J Clin Med*. 2021; 11:76. <https://doi.org/10.3390/jcm11010076> PMID:35011817
26. Livingston G, Huntley J, Sommerlad A, Ames D, Ballard C, Banerjee S, Brayne C, Burns A, Cohen-Mansfield J, Cooper C, Costafreda SG, Dias A, Fox N, et al. Dementia prevention, intervention, and care: 2020 report of the Lancet Commission. *Lancet*. 2020; 396:413–46.

- [https://doi.org/10.1016/S0140-6736\(20\)30367-6](https://doi.org/10.1016/S0140-6736(20)30367-6)  
PMID:[32738937](https://pubmed.ncbi.nlm.nih.gov/32738937/)
27. Safa F, Chaiton M, Mahmud I, Ahmed S, Chu A. The association between exposure to second-hand smoke and sleep disturbances: A systematic review and meta-analysis. *Sleep Health*. 2020; 6:702–14.  
<https://doi.org/10.1016/j.sleh.2020.03.008>  
PMID:[32446663](https://pubmed.ncbi.nlm.nih.gov/32446663/)
28. Covassin N, Singh P. Sleep Duration and Cardiovascular Disease Risk: Epidemiologic and Experimental Evidence. *Sleep Med Clin*. 2016; 11:81–9.  
<https://doi.org/10.1016/j.jsmc.2015.10.007>  
PMID:[26972035](https://pubmed.ncbi.nlm.nih.gov/26972035/)
29. Scott AJ, Webb TL, Martyn-St James M, Rowse G, Weich S. Improving sleep quality leads to better mental health: A meta-analysis of randomised controlled trials. *Sleep Med Rev*. 2021; 60:101556.  
<https://doi.org/10.1016/j.smr.2021.101556>  
PMID:[34607184](https://pubmed.ncbi.nlm.nih.gov/34607184/)
30. Bennett S, Thomas AJ. Depression and dementia: cause, consequence or coincidence? *Maturitas*. 2014; 79:184–90.  
<https://doi.org/10.1016/j.maturitas.2014.05.009>  
PMID:[24931304](https://pubmed.ncbi.nlm.nih.gov/24931304/)
31. Dramé M, Cantegrit E, Godaert L. Self-Rated Health as a Predictor of Mortality in Older Adults: A Systematic Review. *Int J Environ Res Public Health*. 2023; 20:3813.  
<https://doi.org/10.3390/ijerph20053813>  
PMID:[36900823](https://pubmed.ncbi.nlm.nih.gov/36900823/)
32. Stata. *Statistics/Data Analysis: Release 18.0*. (Texas, College Station: Stata Corporation). 2023.
33. Lee KJ, Carlin JB. Multiple imputation for missing data: fully conditional specification versus multivariate normal imputation. *Am J Epidemiol*. 2010; 171:624–32.  
<https://doi.org/10.1093/aje/kwp425>  
PMID:[20106935](https://pubmed.ncbi.nlm.nih.gov/20106935/)
34. Beydoun MA, Noren Hooten N, Georgescu MF, Beydoun HA, Eid SM, Fanelli-Kuczmariski MT, Evans MK, Zonderman AB. Serum neurofilament light chain as a prognostic marker of all-cause mortality in a national sample of US adults. *Eur J Epidemiol*. 2024; 39:795–809.  
<https://doi.org/10.1007/s10654-024-01131-7>  
PMID:[38771439](https://pubmed.ncbi.nlm.nih.gov/38771439/)
35. Beydoun MA, Beydoun HA, Ashe J, Georgescu MF, Horvath S, Lu A, Zannas AS, Shadyab AH, Jung SY, Wassertheil-Smoller S, Casanova R, Zonderman AB, Brunner RL. Relationships of depression and antidepressant use with epigenetic age acceleration and all-cause mortality among postmenopausal women. *Aging (Albany NY)*. 2024; 16:8446–71.  
<https://doi.org/10.18632/aging.205868>  
PMID:[38809417](https://pubmed.ncbi.nlm.nih.gov/38809417/)
36. Discacciati A, Bellavia A, Lee JJ, Mazumdar M, Valeri L. Med4way: a Stata command to investigate mediating and interactive mechanisms using the four-way effect decomposition. *Int J Epidemiol*. 2018. [Epub ahead of print].  
<https://doi.org/10.1093/ije/dyy236>  
PMID:[30452641](https://pubmed.ncbi.nlm.nih.gov/30452641/)
37. Selvin S. *Statistical Analysis of Epidemiologic Data*, (3rd edn), Monographs in Epidemiology and Biostatistics. 2004. Oxford Academic: New York.  
<https://doi.org/10.1093/acprof:oso/9780195172805.001.0001>
38. Merlino G, Lorenzetti S, Gigli GL, Del Negro I, Tereshko Y, Smeralda C, Piani A, Valente M. Insomnia and daytime sleepiness predict 20-year mortality in older male adults: data from a population-based study. *Sleep Med*. 2020; 73:202–7.  
<https://doi.org/10.1016/j.sleep.2020.06.025>  
PMID:[32858331](https://pubmed.ncbi.nlm.nih.gov/32858331/)
39. Gao C, Guo J, Gong TT, Lv JL, Li XY, Liu FH, Zhang M, Shan YT, Zhao YH, Wu QJ. Sleep Duration/Quality With Health Outcomes: An Umbrella Review of Meta-Analyses of Prospective Studies. *Front Med (Lausanne)*. 2022; 8:813943.  
<https://doi.org/10.3389/fmed.2021.813943>  
PMID:[35127769](https://pubmed.ncbi.nlm.nih.gov/35127769/)
40. Kwok CS, Kontopantelis E, Kuligowski G, Gray M, Muhyaldeen A, Gale CP, Peat GM, Cleator J, Chew-Graham C, Loke YK, Mamas MA. Self-Reported Sleep Duration and Quality and Cardiovascular Disease and Mortality: A Dose-Response Meta-Analysis. *J Am Heart Assoc*. 2018; 7:e008552.  
<https://doi.org/10.1161/JAHA.118.008552>  
PMID:[30371228](https://pubmed.ncbi.nlm.nih.gov/30371228/)
41. Irwin MR. Why sleep is important for health: a psychoneuroimmunology perspective. *Annu Rev Psychol*. 2015; 66:143–72.  
<https://doi.org/10.1146/annurev-psych-010213-115205>  
PMID:[25061767](https://pubmed.ncbi.nlm.nih.gov/25061767/)
42. Loprinzi PD. Health Behavior Combinations and Their Association With Inflammation. *Am J Health Promot*. 2016; 30:331–4.  
<https://doi.org/10.1177/0890117116646340>  
PMID:[27404641](https://pubmed.ncbi.nlm.nih.gov/27404641/)
43. Dominguez LJ, Veronese N, Vernuccio L, Catanese G, Inzerillo F, Salemi G, Barbagallo M. Nutrition, Physical Activity, and Other Lifestyle Factors in the Prevention of Cognitive Decline and Dementia. *Nutrients*. 2021; 13:4080.  
<https://doi.org/10.3390/nu13114080>  
PMID:[34836334](https://pubmed.ncbi.nlm.nih.gov/34836334/)

44. Turrini S, Wong B, Eldaief M, Press DZ, Sinclair DA, Koch G, Avenanti A, Santarnecchi E. The multifactorial nature of healthy brain ageing: Brain changes, functional decline and protective factors. *Ageing Res Rev.* 2023; 88:101939.  
<https://doi.org/10.1016/j.arr.2023.101939>  
PMID:[37116664](https://pubmed.ncbi.nlm.nih.gov/37116664/)
45. Henry JD, Grainger SA, von Hippel W. Determinants of Social Cognitive Aging: Predicting Resilience and Risk. *Annu Rev Psychol.* 2023; 74:167–92.  
<https://doi.org/10.1146/annurev-psych-033020-121832>  
PMID:[35973407](https://pubmed.ncbi.nlm.nih.gov/35973407/)
46. Dewey ME, Saz P. Dementia, cognitive impairment and mortality in persons aged 65 and over living in the community: a systematic review of the literature. *Int J Geriatr Psychiatry.* 2001; 16:751–61.  
<https://doi.org/10.1002/gps.397>  
PMID:[11536341](https://pubmed.ncbi.nlm.nih.gov/11536341/)
47. Co M, Couch E, Gao Q, Martinez A, Das-Munshi J, Prina M. Differences in survival and mortality in minority ethnic groups with dementia: A systematic review and meta-analysis. *Int J Geriatr Psychiatry.* 2021; 36:1640–63.  
<https://doi.org/10.1002/gps.5590>  
PMID:[34324226](https://pubmed.ncbi.nlm.nih.gov/34324226/)
48. Robbins R, Quan SF, Weaver MD, Bormes G, Barger LK, Czeisler CA. Examining sleep deficiency and disturbance and their risk for incident dementia and all-cause mortality in older adults across 5 years in the United States. *Ageing (Albany NY).* 2021; 13:3254–68.  
<https://doi.org/10.18632/aging.202591>  
PMID:[33570509](https://pubmed.ncbi.nlm.nih.gov/33570509/)
49. Shi L, Chen SJ, Ma MY, Bao YP, Han Y, Wang YM, Shi J, Vitiello MV, Lu L. Sleep disturbances increase the risk of dementia: A systematic review and meta-analysis. *Sleep Med Rev.* 2018; 40:4–16.  
<https://doi.org/10.1016/j.smrv.2017.06.010>  
PMID:[28890168](https://pubmed.ncbi.nlm.nih.gov/28890168/)
50. Cao Z, Dintica C, Shang Y, Cheng Y, Li S, Yang H, Sun L, Xu W, Wang Y. The Role of Cognitive Impairment, Physical Disability, and Chronic Conditions in the Association of Sleep Duration With All-Cause Mortality Among Very Old Adults. *J Am Med Dir Assoc.* 2020; 21:1458–63.e2.  
<https://doi.org/10.1016/j.jamda.2020.02.017>  
PMID:[32280003](https://pubmed.ncbi.nlm.nih.gov/32280003/)
51. Fernandez-Mendoza J, He F, Calhoun SL, Vgontzas AN, Liao D, Bixler EO. Objective short sleep duration increases the risk of all-cause mortality associated with possible vascular cognitive impairment. *Sleep Health.* 2020; 6:71–8.  
<https://doi.org/10.1016/j.sleh.2019.09.003>  
PMID:[31759934](https://pubmed.ncbi.nlm.nih.gov/31759934/)
52. Lichstein KL, Durrence HH, Riedel BW, Taylor DJ, Bush AJ. *Epidemiology of sleep: Age, gender, and ethnicity.* (Mahwah, NJ, US: Lawrence Erlbaum Associates Publishers). 2004.  
<https://psycnet.apa.org/record/2004-16236-000>
53. Krueger PM, Friedman EM. Sleep duration in the United States: a cross-sectional population-based study. *Am J Epidemiol.* 2009; 169:1052–63.  
<https://doi.org/10.1093/aje/kwp023>  
PMID:[19299406](https://pubmed.ncbi.nlm.nih.gov/19299406/)
54. 2022 Alzheimer's disease facts and figures. *Alzheimers Dement.* 2022; 18:700–89.  
<https://doi.org/10.1002/alz.12638>  
PMID:[35289055](https://pubmed.ncbi.nlm.nih.gov/35289055/)
55. Case A, Deaton A. Mortality and morbidity in the 21<sup>st</sup> century. *Brookings Pap Econ Act.* 2017; 2017:397–476.  
<https://doi.org/10.1353/eca.2017.0005>  
PMID:[29033460](https://pubmed.ncbi.nlm.nih.gov/29033460/)

## SUPPLEMENTARY MATERIALS

### Supplementary Methods

#### Supplementary Method 1: Algorithmically defined dementia outcomes

The algorithms estimate a predicted dementia probability using different combinations of socio-demographic characteristics, health and physical functioning variables, social engagement indicators, and cognitive indicators (i.e., cognition test item scores and proxy-reports of cognition) to classify dementia status using race/ethnicity-specific probability thresholds. Each algorithm was designed to minimize differences in prediction accuracy across race/ethnicity groups, with pairwise differences of 3 percentage points for sensitivity and 5 percentage points for specificity, and is thus suitable for use in race/ethnicity disparities research.

This data file (hrs dementia\_20211109.sas7bdat) was created using the 2018 RAND V1 HRS longitudinal file (“randhrs1992\_2018v1”) and core HRS data; code for

reproducing this dataset is available in the following Github repository, and is dated 2021\_1109.

Note the small differences in the probabilities and classifications for all years in this dataset compared to the previously distributed dataset (hrs dementia\_20191028.sas7bdat) due to differences in the source data. This previously distributed dataset covered 2000 to 2014, and was created using the 2014 RAND HRS longitudinal V2 file (“randhrs1992\_2014v2”) and core HRS data; code for reproducing this prior version of the dataset is available in the following Github repository and is dated 2019\_0529: [https://github.com/powerpilab/AD\\_algorithm\\_development](https://github.com/powerpilab/AD_algorithm_development).

#### Supplementary Method 2: Poor sleep quality

[https://hrs.isr.umich.edu/sites/default/files/meta/2006/core/codebook/h06c\\_ri.htm](https://hrs.isr.umich.edu/sites/default/files/meta/2006/core/codebook/h06c_ri.htm)

KC083 TROUBLE FALLING ASLEEP

Section: C Level: Respondent Type: Numeric Width: 1 Decimals: 0

Ref: SecC.Sleep.C083\_

How often do you have trouble falling asleep?

Would you say most of the time, sometimes, or rarely or never?

.....

- 2570 1. MOST OF THE TIME
- 5482 2. SOMETIMES
- 10382 3. RARELY OR NEVER
- 32 8. DK (Don't Know); NA (Not Ascertained)
- 1 9. RF (Refused)
- 2 Blank. INAP (Inapplicable); Partial Interview

KC084 TROUBLE WAKING UP DURING NIGHT

Section: C Level: Respondent Type: Numeric Width: 1 Decimals: 0

Ref: SecC.Sleep.C084\_

How often do you have trouble with waking up during the night?

(Would you say most of the time, sometimes, or rarely or never?)

- 
- 4783 1. MOST OF THE TIME
  - 6257 2. SOMETIMES
  - 7351 3. RARELY OR NEVER
  - 71 8. DK (Don't Know); NA (Not Ascertained)
  - 5 9. RF (Refused)
  - 2 Blank. INAP (Inapplicable); Partial Interview

KC085 TROUBLE WAKING UP TOO EARLY

Section: C Level: Respondent Type: Numeric Width: 1 Decimals: 0  
Ref: SecC.Sleep.C085\_

How often do you have trouble with waking up too early and not being able to fall asleep again?  
(Would you say most of the time, sometimes, or rarely or never?)

- 
- 2535 1. MOST OF THE TIME
  - 5349 2. SOMETIMES
  - 10490 3. RARELY OR NEVER
  - 90 8. DK (Don't Know); NA (Not Ascertained)
  - 3 9. RF (Refused)
  - 2 Blank. INAP (Inapplicable); Partial Interview

KC086 FEEL RESTED IN MORNING

Section: C Level: Respondent Type: Numeric Width: 1 Decimals: 0  
Ref: SecC.Sleep.C086\_

How often do you feel really rested when you wake up in the morning?  
(Would you say most of the time, sometimes, or rarely or never?)

- 
- 10955 1. MOST OF THE TIME
  - 4482 2. SOMETIMES
  - 2901 3. RARELY OR NEVER
  - 127 8. DK (Don't Know); NA (Not Ascertained)
  - 2 9. RF (Refused)
  - 2 Blank. INAP (Inapplicable); Partial Interview

KC232U2 MEDICATIONS TO SLEEP

Section: C Level: Respondent Type: Numeric Width: 1 Decimals: 0  
Ref: SecC.Sleep.C232\_

*In the past two weeks, have you taken any medications or used other treatments to help you sleep?*

- .....
- 3337 1. YES
  - 15077 5. NO
  - 49 8. DK (Don't Know); NA (Not Ascertained)
  - 4 9. RF (Refused)
  - 2 Blank. INAP (Inapplicable); Partial Interview

ASK:

IF C232\_ = YES

-----

**KC233 MEDICATIONS RECOMMENDED BY DOCTOR**

Section: C Level: Respondent Type: Numeric Width: 1 Decimals: 0  
Ref: SecC.Sleep.C233\_MEDICATIONS

*Were these medications or other treatments recommended to you by a doctor?*

- .....
- 2331 1. YES
  - 1002 5. NO
  - 4 8. DK (Don't Know); NA (Not Ascertained)
  - 9. RF (Refused)
  - 15132 Blank. INAP (Inapplicable); Partial Interview

### Supplementary Method 3: Four-way decomposition

In this study, each potential mediator/moderator was entered into four-way decomposition models, thus breaking down the relationship between a specific exposure and the common outcome (all-cause mortality risk) into four distinct parts: (i) neither mediation nor interaction, or controlled direct effect (CDE); (ii) interaction alone (and not mediation), or Interaction Referent (INTRED); (iii) both mediation and interaction, or mediated interaction (INTMED); and (iv) only mediation (but not interaction), or pure indirect effect (PIE). This recently proposed approach in Stata, which enables the estimation of the four-way decomposition using parametric or semi-parametric regression models, integrates methods to assign effects to interactions with methods to test mediation. Importantly, *Med4way* command [1] (<https://github.com/anddis/med4way>) was used to test mediation and interaction of the total effect

of poor sleep quality or dementia odds (or status) on the all-cause dementia outcome, with the other exposure becoming an alternative potential mediator/moderator, using Cox PH models for the outcome and OLS for each mediator/moderator. This allowed us to examine those relationships in a bi-directional manner. Four-way decomposition was applied to the total sample, using a common set of exogenous variables, described in the Covariates section. Type I error was set at 0.05 for all analyses.

Additional information is available in supplementary file: appendix-dementia-algorithms-fourwaydecomposition.pdf.

## Supplementary literature search and review:

**Methods:** Utilized PubMed Advanced Search Builder to search for articles within past 5 years, emphasizing 2022 and 2023 articles. Utilized Google to supplement search.

**Reviews:** Examining sleep quality and mortality; sleep quality and dementia; and dementia and mortality.

- Gao, C., Guo, J., Gong, T. T., Lv, J. L., Li, X. Y., Liu, F. H., Zhang, M., Shan, Y. T., Zhao, Y. H., & Wu, Q. J. (2022). Sleep duration/quality with health outcomes: An umbrella review of meta-analyses of prospective studies. *Frontiers in Medicine*, 8, 813943. <https://doi.org/10.3389/fmed.2021.813943>
  - Only the evidence of the association of long sleep with an increased risk of all-cause mortality was graded as highly suggestive.
  - Suggestive evidence supported the associations between long sleep and 5 increased risk of health outcomes (stroke, dyslipidemia, mortality of coronary heart disease, stroke mortality, and the development or death of stroke).
  - Examined 85 meta-analyses.
- Casagrande, M., Forte, G., Favieri, F., & Corbo, I. (2022). Sleep quality and aging: A systematic review on healthy older people, mild cognitive impairment and Alzheimer's disease. *International Journal of Environmental Research and Public Health*, 19(14), 8457. <https://doi.org/10.3390/ijerph19148457>
  - The most common aspect compromised in Alzheimer's disease and mild cognitive impairment were REM sleep, sleep efficiency, sleep latency, and sleep duration.
  - These results underline that sleep alterations are associated with cognitive impairment.
  - The frequency and severity of sleep disturbance appear to follow the evolution of cognitive impairment.
- Ono, R., Sakurai, T., Sugimoto, T., Uchida, K., Nakagawa, T., Noguchi, T., Komatsu, A., Arai, H., & Saito, T. (2023). Mortality risks and causes of death by dementia types in a Japanese cohort with dementia: NCGG-STORIES. *Journal of Alzheimer's Disease: JAD*, 92(2), 487–498. <https://doi.org/10.3233/JAD-221290>
  - Patients with all types of dementia and mild cognitive impairment had higher mortality rates than those with normal cognition.
  - The most common cause of death was pneumonia, followed by cancer.
  - In the mild cognitive impairment, Alzheimer's disease, and dementia with Lewy bodies groups, older age, male sex, and low cognitive function were common prognostic factors but not presence of apolipoprotein E ε4 allele.

**Meta-analyses:** Examining sleep quality and mortality; sleep quality and dementia; and dementia and mortality.

- Kwok, C. S., Kontopantelis, E., Kuligowski, G., Gray, M., Muhyaldeen, A., Gale, C. P., Peat, G. M., Cleator, J., Chew-Graham, C., Loke, Y. K., & Mamas, M. A. (2018). Self-reported sleep duration and quality and cardiovascular disease and mortality: A dose-response meta-analysis. *Journal of the American Heart Association*, 7(15), e008552. <https://doi.org/10.1161/JAHA.118.008552>
  - Self-reported duration of sleep >8 hours was associated with a moderate increased risk of all-cause mortality.
  - Subjective poor sleep quality was associated with coronary heart disease but no difference in mortality.
  - Divergence from the recommended 7 to 8 hours of sleep is associated with a higher risk of mortality and cardiovascular events.
- Shi, L., Chen, S. J., Ma, M. Y., Bao, Y. P., Han, Y., Wang, Y. M., Shi, J., Vitiello, M. V., & Lu, L. (2018). Sleep disturbances increase the risk of dementia: A systematic review and meta-analysis. *Sleep Medicine Reviews*, 40, 4–16. <https://doi.org/10.1016/j.smrv.2017.06.010>
  - Compared with individuals without sleep disturbances, subjects who reported sleep disturbances had a higher risk of incident all-cause dementia, AD, and vascular dementia.
  - The subgroup analysis showed that insomnia increased the risk of AD but not vascular or all-cause dementia.



- Sleep disordered breathing was associated with a higher incidence of all-cause dementia, AD, and vascular dementia.
- Saragih, I. D., Saragih, I. S., Batubara, S. O., & Lin, C. J. (2021). Dementia as a mortality predictor among older adults with COVID-19: A systematic review and meta-analysis of observational study. *Geriatric Nursing (New York, N.Y.)*, 42(5), 1230–1239. <https://doi.org/10.1016/j.gerinurse.2021.03.007>
  - The pooled mortality rates of dementia and non-dementia older adults infected with COVID-19 were 39% and 20%.
  - Overall, dementia was the main factor influencing poor health outcomes and high rates of mortality in older adults with COVID-19 infection.
  - Shows that older adults with dementia with COVID-19 infection have a higher risk of mortality compared with older adults without dementia.

**Cohort studies:** Examining the association between sleep quality and mortality; sleep quality and dementia; and dementia and mortality.

- Garfield, V., Joshi, R., Garcia-Hernandez, J., Tillin, T., & Chaturvedi, N. (2019). The relationship between sleep quality and all-cause, CVD and cancer mortality: The Southall and Brent REvisited study (SABRE). *Sleep Medicine*, 60, 230–235. <https://doi.org/10.1016/j.sleep.2019.03.012>
  - Findings suggest that the relationship between sleep quality and mortality may differ by ethnic group.
  - In Europeans, early morning waking was associated with a moderately increased risk of cardiovascular death.
  - In South Asians difficulty falling asleep was related to an increased risk of all-cause mortality.
- Wong, R., & Lovier, M. A. (2023). Sleep disturbances and dementia risk in older adults: Findings from 10 Years of national U.S. prospective data. *American Journal of Preventive Medicine*, 64(6), 781–787. <https://doi.org/10.1016/j.amepre.2023.01.008>
  - In the unadjusted model, sleep-initiation insomnia was significantly associated with a 51% increased dementia risk.
  - Adjusted for sociodemographics, sleep-medication usage was significantly associated with a 30% increased dementia risk.
  - Adjusted for sociodemographics and health, sleep-maintenance insomnia was significantly associated with a 40% decreased dementia risk.
- Taudorf, L., Nørgaard, A., Brodaty, H., Laursen, T. M., & Waldemar, G. (2021). Dementia increases mortality beyond effects of comorbid conditions: A national registry-based cohort study. *European Journal of Neurology*, 28(7), 2174–2184. <https://doi.org/10.1111/ene.14875>
  - The comorbidity load was associated with increased mortality in both people with and without dementia.
  - Mortality in dementia remained increased, even after adjusting for psychiatric and chronic somatic comorbidities. Our findings suggest that dementia disorders alone contribute to excess mortality, which may be further increased by comorbidities.
  - Findings suggest that dementia disorders alone contribute to excess mortality, which may be further increased by comorbidities.

## Supplementary References

1. Discacciati A, Bellavia A, Lee JJ, Mazumdar M, Valeri L. Med4way: a Stata command to investigate mediating and interactive mechanisms using the four-way effect decomposition. *Int J Epidemiol*. 2018. [Epub ahead of print]. <https://doi.org/10.1093/ije/dyy236>  
PMID:30452641

## Supplementary Figure

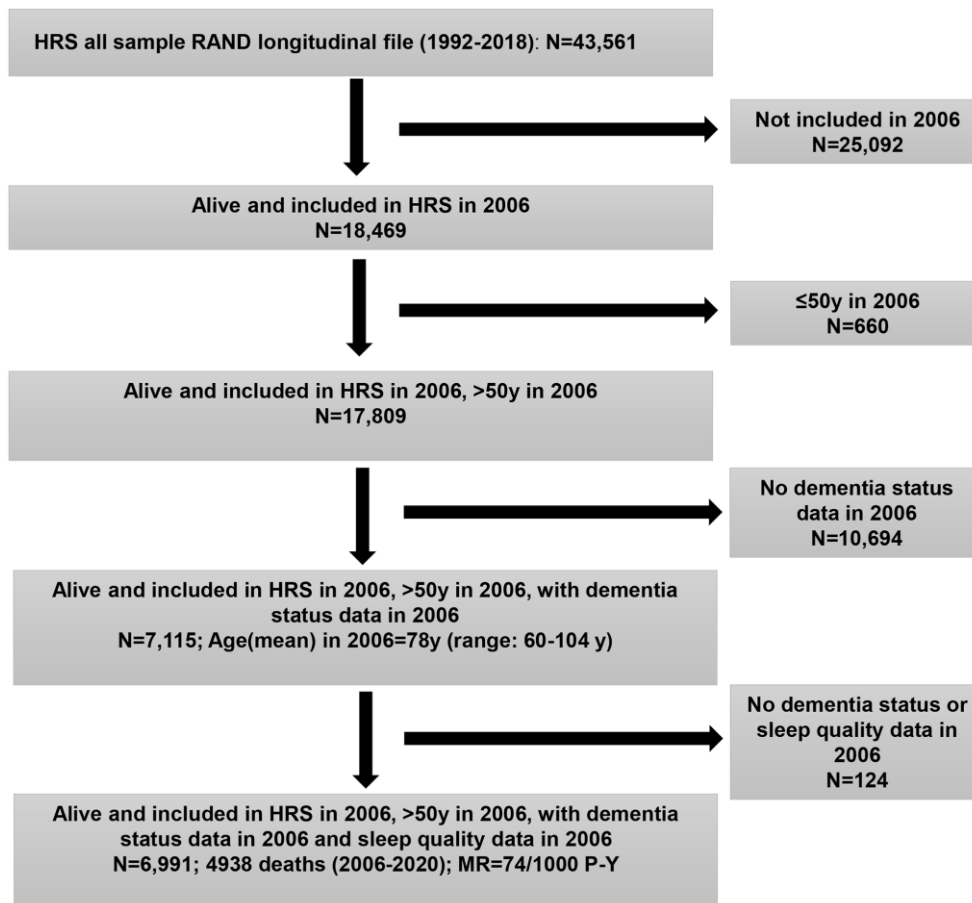

**Supplementary Figure 1. Participant flowchart.** Abbreviations: HRS: Health and Retirement Study; MR: Mortality Rate; P-Y: Person-Years.

## Supplementary Tables

**Supplementary Table 1. Dementia odds (Log<sub>e</sub> transformed) and all-cause mortality: four-way decomposition models by poor sleep quality (alternative measure), overall, by sex and by race: HRS 2006–2020<sup>a,b</sup>.**

| Y: All-cause mortality;<br>X: Poor sleep quality<br>score | TE                     |          | CDE                     |          | INTREF                    |              | INTMED                    |              | PIE                        |              |
|-----------------------------------------------------------|------------------------|----------|-------------------------|----------|---------------------------|--------------|---------------------------|--------------|----------------------------|--------------|
|                                                           | $\beta \pm SE$         | <i>P</i> | $\beta \pm SE$          | <i>P</i> | $\beta \pm SE$            | <i>P</i>     | $\beta \pm SE$            | <i>P</i>     | $\beta \pm SE$             | <i>P</i>     |
| <b>Overall</b>                                            |                        |          |                         |          |                           |              |                           |              |                            |              |
| <b>Reduced Model 1A–1C (N = 6,991)</b>                    |                        |          |                         |          |                           |              |                           |              |                            |              |
| X: Hurd                                                   | +0.39460 ±<br>0.01918  | <0.001   | +0.39453 ±<br>0.01903   | <0.001   | -0.00014 ±<br>0.00038     | 0.72         | -3.30e-07 ±<br>0.00011    | 0.99         | +0.00020 ±<br>0.00044      | 0.65         |
| X: Expert                                                 | +0.62019 ±<br>0.0298   | <0.001   | +0.62213 ±<br>0.02983   | <0.001   | +0.00044 ±<br>0.00144     | 0.76         | -0.00357 ±<br>0.00156     | <b>0.022</b> | +0.00120 ±<br>0.00081      | 0.14         |
| X: LASSO                                                  | +0.58189 ±<br>0.026789 | <0.001   | +0.58260 ±<br>0.02677   | <0.001   | -0.00025 ±<br>0.00106     | 0.81         | -0.00099 ±<br>0.00060     | 0.27         | 0.00051                    | 0.29         |
| <b>Full model 2A–2C (N = 6,510)</b>                       |                        |          |                         |          |                           |              |                           |              |                            |              |
| X: Hurd                                                   | +0.50834 ±<br>0.04784  | <0.001   | +0.46549 ±<br>0.045689  | <0.001   | +0.01968 ±<br>0.00630     | <b>0.002</b> | +0.01734 ±<br>0.00537     | <b>0.001</b> | +0.00583 ±<br>0.00204      | <b>0.004</b> |
| X: Expert                                                 | +0.38242 ±<br>0.03200  | <0.001   | +0.35769 ±<br>0.03106   | <0.001   | +0.01078 ±<br>0.00355     | <b>0.002</b> | +0.00946 ±<br>0.00281     | <b>0.001</b> | +0.0045349 ±<br>0.0015896  | <b>0.004</b> |
| X: LASSO                                                  | +0.44499 ±<br>0.03451  | <0.001   | +0.41445 ±<br>0.03359   | <0.001   | +0.01213 ±<br>0.00403     | <b>0.003</b> | +0.01275 ±<br>0.00343     | <0.001       | +0.005669 ±<br>0.00184     | <b>0.002</b> |
| <b>Male</b>                                               |                        |          |                         |          |                           |              |                           |              |                            |              |
| <b>Reduced Model 1A–1C (N = 2,931)</b>                    |                        |          |                         |          |                           |              |                           |              |                            |              |
| X: Hurd                                                   | +0.56222 ±<br>0.04511  | <0.001   | +0.55160 ±<br>0.04485   | <0.001   | +0.013821 ±<br>0.00710    | <b>0.052</b> | -0.00520 ±<br>0.00319     | 0.10         | +0.0020 ±<br>0.00150       | 0.19         |
| X: Expert                                                 | +0.60690 ±<br>0.05047  | <0.001   | +0.60239 ±<br>0.05057   | <0.001   | +0.00737 ±<br>0.00622     | 0.24         | -0.0054 ±<br>0.00406      | 0.18         | +0.00255 ±<br>0.00224      | 0.26         |
| X: LASSO                                                  | +0.57335 ±<br>0.04414  | <0.001   | +0.56778 ±<br>0.04411   | <0.001   | +0.0074 ±<br>0.00576      | 0.20         | -0.00389 ±<br>0.00278     | 0.16         | +0.00202 ±<br>0.00161      | 0.21         |
| <b>Full model 2A–2C (N = 2,698)</b>                       |                        |          |                         |          |                           |              |                           |              |                            |              |
| X: Hurd                                                   | +0.41639 ±<br>0.07245  | <0.001   | +0.36523 ±<br>±0.068596 | <0.001   | +0.040039 ±<br>0.015321   | <b>0.009</b> | +0.0085921 ±<br>0.0069285 | 0.22         | +0.002532 ±<br>0.0022419   | 0.26         |
| X: Expert                                                 | +0.26999 ±<br>0.047615 | <0.001   | +0.24175 ±<br>0.046239  | <0.001   | +0.021059 ±<br>0.0088441  | 0.017        | 0.0048072 ±<br>0.0032497  | 0.14         | +0.0023808 ±<br>±0.0018317 | 0.19         |
| X: LASSO                                                  | +0.35083 ±<br>0.051341 | <0.001   | +0.32061 ±<br>0.050018  | <0.001   | +0.021737 ±<br>0.010039   | <b>0.030</b> | +0.005549 ±<br>0.003598   | 0.12         | +0.0029342 ±<br>0.0020567  | 0.15         |
| <b>Female</b>                                             |                        |          |                         |          |                           |              |                           |              |                            |              |
| <b>Reduced Model 1A–1C (N = 4,060)</b>                    |                        |          |                         |          |                           |              |                           |              |                            |              |
| X: Hurd                                                   | +0.37611 ±<br>0.023086 | <0.001   | +0.37427 ±<br>0.022192  | <0.001   | +0.002193 ±<br>0.0026789  | 0.41         | -0.0001658 ±<br>0.0003734 | 0.66         | -0.0001828 ±<br>0.0003964  | 0.65         |
| X: Expert                                                 | +0.63458 ±<br>0.037328 | <0.001   | +0.64323 ±<br>0.037345  | <0.001   | -0.0068712 ±<br>0.0022929 | <b>0.003</b> | -0.0024374 ±<br>0.0017279 | 0.16         | +0.0006561 ±<br>0.0007173  | 0.36         |
| X: LASSO                                                  | +0.6017 ±<br>0.034544  | <0.001   | +0.60697 ±<br>0.034311  | <0.001   | -0.0053899 ±<br>0.0024186 | <b>0.026</b> | +0.0002494 ±<br>0.000989  | 0.80         | -0.0001342 ±<br>0.0005357  | 0.80         |
| <b>Full model 2A–2C (N = 3,812)</b>                       |                        |          |                         |          |                           |              |                           |              |                            |              |
| X: Hurd                                                   | +0.56999 ±<br>0.06366  | <0.001   | +0.53713 ±<br>0.061636  | <0.001   | +0.0016369 ±<br>0.00547   | 0.77         | +0.022984 ±<br>0.0078648  | <b>0.003</b> | +0.0082415 ±<br>0.00313    | <b>0.008</b> |
| X: Expert                                                 | +0.45958 ±<br>0.043156 | <0.001   | +0.44125 ±<br>0.042226  | <0.001   | -0.0015519 ±<br>0.0034798 | 0.66         | +0.013771 ±<br>0.0044423  | <b>0.002</b> | +0.0061107 ±<br>0.0023974  | <b>0.011</b> |
| X: LASSO                                                  | +0.51303 ±<br>0.046599 | <0.001   | +0.48847 ±<br>0.045698  | <0.001   | -0.0020449 ±<br>0.0037046 | 0.58         | +0.019134 ±<br>0.0055133  | <b>0.001</b> | +0.0074635 ±<br>0.0028207  | <b>0.008</b> |

| <b>White</b>                           |                        |        |                         |        |                            |       |                           |        |                            |       |
|----------------------------------------|------------------------|--------|-------------------------|--------|----------------------------|-------|---------------------------|--------|----------------------------|-------|
| <b>Reduced Model 1A–1C (N = 5,666)</b> |                        |        |                         |        |                            |       |                           |        |                            |       |
| X: Hurd                                | +0.40035 ±<br>0.021778 | <0.001 | +0.40084 ±<br>0.021522  | <0.001 | −0.0000128 ±<br>0.0009433  | 0.99  | −0.0000583 ±<br>0.0002188 | 0.79   | −0.000416 ±<br>0.0007205   | 0.56  |
| X: Expert                              | +0.65841 ±<br>0.034181 | <0.001 | +0.66013 ±<br>0.034132  | <0.001 | −0.0013205 ±<br>0.0010699  | 0.22  | −0.0013384 ±<br>0.001134  | 0.24   | +0.0009395 ±<br>0.0007591  | 0.22  |
| X: LASSO                               | +0.58944 ±<br>0.029623 | <0.001 | +0.59089 ±<br>0.029593  | <0.001 | −0.0014574 ±<br>0.0009838  | 0.14  | +0.0001398 ±<br>0.0007785 | 0.86   | −0.0001271 ±<br>0.0007059  | 0.86  |
| <b>Full model 2A–2C (N = 5,324)</b>    |                        |        |                         |        |                            |       |                           |        |                            |       |
| X: Hurd                                | +0.52799 ±<br>0.05374  | <0.001 | +0.4828 ±<br>0.051197   | <0.001 | +0.019272 ±<br>0.0071537   | 0.007 | +0.020357 ±<br>0.0064565  | 0.002  | +0.0055594 ±<br>0.0022126  | 0.012 |
| X: Expert                              | +0.43223 ±<br>0.03738  | <0.001 | +0.4029 ±<br>0.036271   | <0.001 | +0.010697 ±<br>0.0041516   | 0.010 | +0.013908 ±<br>0.0038493  | <0.001 | +0.0047164 ±<br>0.0019462  | 0.015 |
| X: LASSO                               | +0.47268 ±<br>0.039032 | <0.001 | +0.43754 ±<br>0.037907  | <0.001 | +0.012776 ±<br>0.0047307   | 0.007 | +0.017013 ±<br>0.0044407  | <0.001 | +0.0053461 ±<br>0.0021258  | 0.012 |
| <b>Black/Hispanic/Others</b>           |                        |        |                         |        |                            |       |                           |        |                            |       |
| <b>Reduced Model 1A–1C (N = 1,325)</b> |                        |        |                         |        |                            |       |                           |        |                            |       |
| X: Hurd                                | +0.36329 ±<br>0.040527 | <0.001 | +0.3657 ±<br>0.040865   | <0.001 | +0.0004392 ±<br>0.002962   | 0.88  | −0.0004587 ±<br>0.0021728 | 0.83   | −0.0023979 ±<br>0.0027029  | 0.38  |
| X: Expert                              | +0.48137 ±<br>0.060746 | <0.001 | +0.48631 ±<br>0.060752  | <0.001 | +0.011991 ±<br>0.0081179   | 0.14  | −0.011995 ±<br>0.006882   | 0.081  | −0.0049335 ±<br>0.0053335  | 0.36  |
| X: LASSO                               | +0.53417 ±<br>±0.06236 | <0.001 | +0.53799 ±<br>±0.062361 | <0.001 | +0.0063964 ±<br>±0.0064947 | 0.33  | −0.0061 ±<br>±0.0053094   | 0.25   | −0.0041111 ±<br>±0.0041556 | 0.32  |
| <b>Full model 2A–C (N = 1,186)</b>     |                        |        |                         |        |                            |       |                           |        |                            |       |
| X: Hurd                                | +0.41074 ±<br>0.10575  | <0.001 | +0.38256 ±<br>0.10227   | <0.001 | +0.015644 ±<br>0.014372    | 0.28  | +0.0061412 ±<br>0.0073845 | 0.41   | +0.0063943 ±<br>0.0067089  | 0.34  |
| X: Expert                              | +0.22672 ±<br>0.061705 | <0.001 | +0.21797 ±<br>0.05989   | <0.001 | +0.0077981 ±<br>0.0082535  | 0.35  | +0.0002961 ±<br>0.0021035 | 0.89   | +0.0006594 ±<br>0.0046543  | 0.89  |
| X: LASSO                               | +0.34001 ±<br>0.075128 | <0.001 | +0.32957 ±<br>0.073668  | <0.001 | +0.0044248 ±<br>0.0090454  | 0.63  | +0.0014626 ±<br>0.0026447 | 0.58   | +0.004556 ±<br>0.00579     | 0.43  |

Abbreviations: CDE: Controlled Direct Effect; HRS: Health and Retirement Study; INTMED: Mediated Interaction; INTREF: Interaction Referent; PIE: Pure Indirect Effect; SE: Standard Error. <sup>a</sup>Cox PH regression models with mortality as the main outcome and poor sleep quality as the potential mediator/moderator allowed to interact with the main exposure. Log<sub>e</sub> (odds (dementia probability)) using Hurd, expert and LASSO algorithms were the main alternative exposures of interest, sample size N = 6,991, four-way decomposition analysis. 1 SD of the “poor sleep quality score” corresponded to 0.72-point higher score. 1 SD of Hurd, expert and LASSO algorithm Log<sub>e</sub> (dementia probability) corresponded to 3.93, 3.13 and 2.40, respectively. <sup>b</sup>Exogenous variables are the ones included in Table 2, Models 1A–1D and 2A–2D, as covariates for the reduced and full models, respectively. See Covariates section for detail.

**Supplementary Table 2. Poor sleep quality (alternative measure) and all-cause mortality: four-way decomposition models by dementia odds (Log<sub>e</sub> transformed), overall, by sex and by race, HRS 2006–2020<sup>a,b</sup>.**

| Y: All-cause mortality;<br>X: Poor sleep quality<br>score | TE                       |                  | CDE                     |                  | INTREF                    |                  | INTMED                    |                  | PIE                       |                  |
|-----------------------------------------------------------|--------------------------|------------------|-------------------------|------------------|---------------------------|------------------|---------------------------|------------------|---------------------------|------------------|
|                                                           | $\beta \pm SE$           | <i>P</i>         | $\beta \pm SE$          | <i>P</i>         | $\beta \pm SE$            | <i>P</i>         | $\beta \pm SE$            | <i>P</i>         | $\beta \pm SE$            | <i>P</i>         |
| <b>Overall</b>                                            |                          |                  |                         |                  |                           |                  |                           |                  |                           |                  |
| <b>Reduced model 1A–1C (N = 6,991)</b>                    |                          |                  |                         |                  |                           |                  |                           |                  |                           |                  |
| M: Hurd                                                   | +0.030902 ±<br>0.015271  | <b>0.043</b>     | +0.030249 ±<br>0.014538 | <b>0.037</b>     | -0.0009163 ±<br>0.002958  | 0.76             | +0.00000325 ±<br>0.000066 | 0.96             | +0.0015668 ±<br>0.003409  | 0.65             |
| M: Expert                                                 | +0.022314 ±<br>0.01533   | 0.14             | +0.023319 ±<br>0.014172 | 0.10             | -0.014888 ±<br>0.0040651  | <b>&lt;0.001</b> | -0.001674 ±<br>0.0007357  | <b>0.023</b>     | +0.015558 ±<br>0.0048172  | <b>0.001</b>     |
| M: LASSO                                                  | +0.021734 ±<br>0.015277  | 0.16             | +0.029001 ±<br>0.014166 | <b>0.029</b>     | -0.012448 ±<br>0.0040104  | <b>0.002</b>     | -0.0005014 ±<br>0.0004548 | 0.27             | +0.0056822 ±<br>0.0046441 | 0.22             |
| <b>Full model 2A–2C (N = 6,510)</b>                       |                          |                  |                         |                  |                           |                  |                           |                  |                           |                  |
| M: Hurd                                                   | -0.071307 ±<br>0.015996  | <b>&lt;0.001</b> | -0.069697 ±<br>0.016273 | <b>&lt;0.001</b> | +0.0056935 ±<br>0.0017507 | <b>&lt;0.001</b> | +0.0039003 ±<br>0.0011567 | <b>0.001</b>     | -0.011204 ±<br>0.0029377  | <b>&lt;0.001</b> |
| M: Expert                                                 | -0.072455 ±<br>0.016005  | <b>&lt;0.001</b> | -0.065013 ±<br>0.016198 | <b>&lt;0.001</b> | +0.0008955 ±<br>0.0012469 | 0.47             | +0.0038437 ±<br>0.0010987 | <b>&lt;0.001</b> | -0.012181 ±<br>0.0030042  | <b>&lt;0.001</b> |
| M: LASSO                                                  | -0.074468 ±<br>0.015933  | <b>&lt;0.001</b> | -0.065691 ±<br>0.016257 | <b>&lt;0.001</b> | +0.0023859 ±<br>0.0013247 | <i>0.072</i>     | +0.0045361 ±<br>0.0011665 | <b>&lt;0.001</b> | -0.015699 ±<br>0.0032712  | <b>&lt;0.001</b> |
| <b>Male</b>                                               |                          |                  |                         |                  |                           |                  |                           |                  |                           |                  |
| <b>Reduced Model 1A–1C (N = 2,931)</b>                    |                          |                  |                         |                  |                           |                  |                           |                  |                           |                  |
| M: Hurd                                                   | +0.036394 ±<br>0.023714  | 0.13             | +0.03855 ±<br>0.022696  | <i>0.085</i>     | -0.012609 ±<br>0.0038722  | <b>0.001</b>     | -0.002007 ±<br>0.0012411  | 0.11             | +0.01246 ±<br>0.0061561   | <b>0.043</b>     |
| M: Expert                                                 | +0.041568 ±<br>0.023999  | <i>0.083</i>     | +0.026619 ±<br>0.022592 | 0.24             | -0.0079929 ±<br>0.004602  | <i>0.082</i>     | -0.0020728 ±<br>0.0015948 | 0.19             | +0.025015 ±<br>0.0068767  | <b>&lt;0.001</b> |
| M: LASSO                                                  | +0.040998 ±<br>0.023893  | <i>0.086</i>     | +0.031346 ±<br>0.022755 | 0.17             | -0.0074983 ±<br>0.003495  | <b>0.032</b>     | -0.0017166 ±<br>0.0012603 | 0.17             | +0.018867 ±<br>0.0068946  | <b>0.006</b>     |
| <b>Full Model 2A–2C (N = 2,698)</b>                       |                          |                  |                         |                  |                           |                  |                           |                  |                           |                  |
| M: Hurd                                                   | -0.049922 ±<br>0.025342  | <b>0.049</b>     | -0.054646 ±<br>0.02556  | <b>0.033</b>     | +0.0074653 ±<br>0.0031169 | <b>0.017</b>     | +0.0018204 ±<br>0.0014413 | 0.21             | -0.0045613 ±<br>0.0034561 | 0.19             |
| M: Expert                                                 | -0.049416 ±<br>0.025435  | <i>0.052</i>     | -0.051529 ±<br>0.025562 | <b>0.044</b>     | +0.0055075 ±<br>0.0026007 | <b>0.034</b>     | +0.0019059 ±<br>0.0012649 | 0.13             | -0.0053001 ±<br>0.0031745 | <i>0.095</i>     |
| M: LASSO                                                  | -0.051863 ±<br>0.025306  | <b>0.040</b>     | -0.057227 ±<br>0.026158 | <b>0.029</b>     | +0.01078 ±<br>0.0043433   | <b>0.013</b>     | +0.001954 ±<br>0.0012319  | 0.11             | -0.0073697 ±<br>0.0039338 | <i>0.061</i>     |
| <b>Female</b>                                             |                          |                  |                         |                  |                           |                  |                           |                  |                           |                  |
| <b>Reduced Model 1A–1C (N = 4,060)</b>                    |                          |                  |                         |                  |                           |                  |                           |                  |                           |                  |
| M: Hurd                                                   | +0.021244 ±<br>0.01996   | 0.29             | +0.020074 ±<br>0.018716 | 0.28             | +0.0036149 ±<br>0.0047921 | 0.45             | -0.0001155 ±<br>0.0002588 | 0.66             | -0.0023297 ±<br>0.0045684 | 0.61             |
| M: Expert                                                 | +0.0092236 ±<br>0.019975 | 0.64             | +0.01992 ±<br>0.018151  | 0.27             | -0.020214 ±<br>0.006299   | <b>0.001</b>     | -0.0012756 ±<br>0.0009076 | 0.16             | +0.010794 ±<br>0.0067233  | 0.11             |
| M: LASSO                                                  | +0.0088882 ±<br>0.019948 | 0.66             | +0.025951 ±<br>0.018025 | 0.15             | -0.015572 ±<br>0.0068724  | <b>0.023</b>     | +0.0001363 ±<br>0.0005395 | 0.80             | -0.0016275 ±<br>0.0063951 | 0.80             |
| <b>Full Model 2A–2C (N = 3,812)</b>                       |                          |                  |                         |                  |                           |                  |                           |                  |                           |                  |
| M: Hurd                                                   | -0.087193 ±<br>0.020602  | <b>&lt;0.001</b> | -0.080351 ±<br>0.021098 | <b>&lt;0.001</b> | +0.0039831 ±<br>0.0021884 | <i>0.069</i>     | +0.0053083 ±<br>0.0017144 | <b>0.002</b>     | -0.016134 ±<br>0.0044396  | <b>&lt;0.001</b> |
| M: Expert                                                 | -0.089694 ±<br>0.020571  | <b>&lt;0.001</b> | -0.073317 ±<br>0.020868 | <b>&lt;0.001</b> | -0.0041846 ±<br>0.0021176 | <b>0.048</b>     | +0.0056334 ±<br>0.0017336 | <b>0.001</b>     | -0.017826 ±<br>0.0047459  | <b>&lt;0.001</b> |
| M: LASSO                                                  | -0.091803 ±<br>0.020474  | <b>&lt;0.001</b> | -0.068552 ±<br>0.020738 | <b>0.001</b>     | -0.0076524 ±<br>0.0023243 | <b>0.001</b>     | +0.0068409 ±<br>0.0018637 | <b>&lt;0.001</b> | -0.022439 ±<br>0.0049456  | <b>&lt;0.001</b> |
| <b>White</b>                                              |                          |                  |                         |                  |                           |                  |                           |                  |                           |                  |
| <b>Reduced Model 1A–1C (N = 5,666)</b>                    |                          |                  |                         |                  |                           |                  |                           |                  |                           |                  |
| M: Hurd                                                   | +0.042615 ±<br>0.017248  | <b>0.013</b>     | +0.045593 ±<br>0.016644 | <b>0.006</b>     | -0.0006782 ±<br>0.00257   | 0.79             | -0.0000424 ±<br>0.0001336 | 0.75             | -0.0022575 ±<br>0.0038237 | 0.56             |
| M: Expert                                                 | +0.035484 ±<br>0.017316  | <b>0.040</b>     | +0.038322 ±<br>0.016226 | <b>0.018</b>     | -0.010111 ±<br>0.00365    | <b>0.006</b>     | -0.000566 ±<br>0.0004904  | 0.25             | +0.0078392 ±<br>0.0054609 | 0.15             |
| M: LASSO                                                  | +0.032891 ±<br>0.017185  | <i>0.056</i>     | +0.043853 ±<br>0.016208 | <b>0.007</b>     | -0.010087 ±<br>0.003663   | <b>0.006</b>     | +0.0000682 ±<br>0.0003795 | 0.86             | -0.0009427 ±<br>0.0052236 | 0.86             |

| <b>Full model 2A–2C (N = 5,324)</b>    |                         |                  |                         |              |                           |                  |                           |                  |                           |                  |
|----------------------------------------|-------------------------|------------------|-------------------------|--------------|---------------------------|------------------|---------------------------|------------------|---------------------------|------------------|
| M: Hurd                                | -0.056391 ±<br>0.017887 | <b>0.002</b>     | -0.061824 ±<br>0.01847  | <b>0.001</b> | +0.013754 ±<br>0.0031299  | <b>&lt;0.001</b> | +0.0045156 ±<br>0.0013674 | <b>0.001</b>     | -0.012836 ±<br>0.0033782  | <b>&lt;0.001</b> |
| M: Expert                              | -0.057803 ±<br>0.017899 | <b>0.001</b>     | -0.052722 ±<br>0.018373 | <b>0.004</b> | +0.0065844 ±<br>0.0020024 | <b>0.001</b>     | +0.0051515 ±<br>0.001365  | <b>&lt;0.001</b> | -0.016816 ±<br>0.0036252  | <b>&lt;0.001</b> |
| M: LASSO                               | -0.05932 ±<br>0.017815  | <b>0.001</b>     | -0.054199 ±<br>0.018439 | <b>0.003</b> | +0.0081853 ±<br>0.0022739 | <b>&lt;0.001</b> | +0.0058666 ±<br>0.0014602 | <b>&lt;0.001</b> | -0.019172 ±<br>0.003814   | <b>&lt;0.001</b> |
| <b>Non-White</b>                       |                         |                  |                         |              |                           |                  |                           |                  |                           |                  |
| <b>Reduced Model 1A–1C (N = 1,325)</b> |                         |                  |                         |              |                           |                  |                           |                  |                           |                  |
| M: Hurd                                | -0.016372 ±<br>0.033019 | 0.62             | -0.03019 ±<br>0.030445  | 0.32         | -0.0018161 ±<br>0.01184   | 0.88             | -0.0002873 ±<br>0.001341  | 0.83             | +0.015922 ±<br>0.0076197  | <b>0.037</b>     |
| M: Expert                              | -0.02867 ±<br>0.033247  | 0.39             | -0.02983 ±<br>0.030918  | 0.34         | -0.032022 ±<br>0.016716   | <b>0.055</b>     | -0.0070443 ±<br>0.0039502 | <b>0.075</b>     | +0.040226 ±<br>0.010528   | <b>&lt;0.001</b> |
| M: LASSO                               | -0.023034 ±<br>0.033538 | 0.48             | -0.031699 ±<br>0.029852 | 0.29         | -0.018889 ±<br>0.015875   | 0.23             | -0.0031746 ±<br>0.0027188 | 0.24             | +0.030728 ±<br>0.010316   | <b>0.003</b>     |
| <b>Full model 2A–2C (N = 1,186)</b>    |                         |                  |                         |              |                           |                  |                           |                  |                           |                  |
| M: Hurd                                | -0.13108 ±<br>0.036592  | <b>&lt;0.001</b> | -0.1111 ±<br>0.037134   | <b>0.003</b> | -0.015845 ±<br>0.010362   | <b>0.13</b>      | +0.0014531 ±<br>0.0016788 | <b>0.39</b>      | -0.0055812 ±<br>0.0056183 | <b>0.32</b>      |
| M: Expert                              | -0.13057 ±<br>0.036569  | <b>&lt;0.001</b> | -0.11974 ±<br>0.037074  | <b>0.001</b> | -0.010308 ±<br>0.0085493  | 0.23             | +0.0001613 ±<br>0.0011436 | 0.89             | -0.0006843 ±<br>0.0048254 | 0.89             |
| M: LASSO                               | -0.13464 ±<br>0.036457  | <b>&lt;0.001</b> | -0.12457 ±<br>0.036056  | <b>0.001</b> | -0.005761 ±<br>0.0085282  | 0.50             | +0.0006235 ±<br>0.0010289 | 0.54             | -0.0049392 ±<br>0.0061316 | 0.42             |

Abbreviations CDE: Controlled Direct Effect; HRS: Health and Retirement Study; INTMED: Mediated Interaction; INTREF: Interaction Referent; PIE: Pure Indirect Effect; SE: Standard Error. <sup>a</sup>Cox PH regression models with mortality as the main outcome and poor sleep quality as the exposure. Log<sub>e</sub> (odds (dementia probability)) using Hurd, expert and LASSO algorithms were potential mediators/moderators allowed to interact with the main exposure, four-way decomposition analysis. 1 SD of the “poor sleep quality score” corresponded to 0.72-point higher score. 1 SD of Hurd, expert and LASSO algorithm Log<sub>e</sub>(dementia probability) corresponded to 3.93, 3.13 and 2.40, respectively. <sup>b</sup>Exogenous variables are the ones included in Table 2, Models 1A–1D and 2A–2D, as covariates for the reduced and full models, respectively. See Covariates section for detail.
