# Supplementary material for: Poor sleep quality, dementia status and their association with all-cause mortality among older US adults
Source: PubMed Central journal article supplement (PMC11424588; doi:10.18632/aging.206102), 2024-09-04
Supplement: aging-16-206102-s002.pdf [file aging-16-206102-s002.pdf]

## SUPPLEMENTARY FIGURE

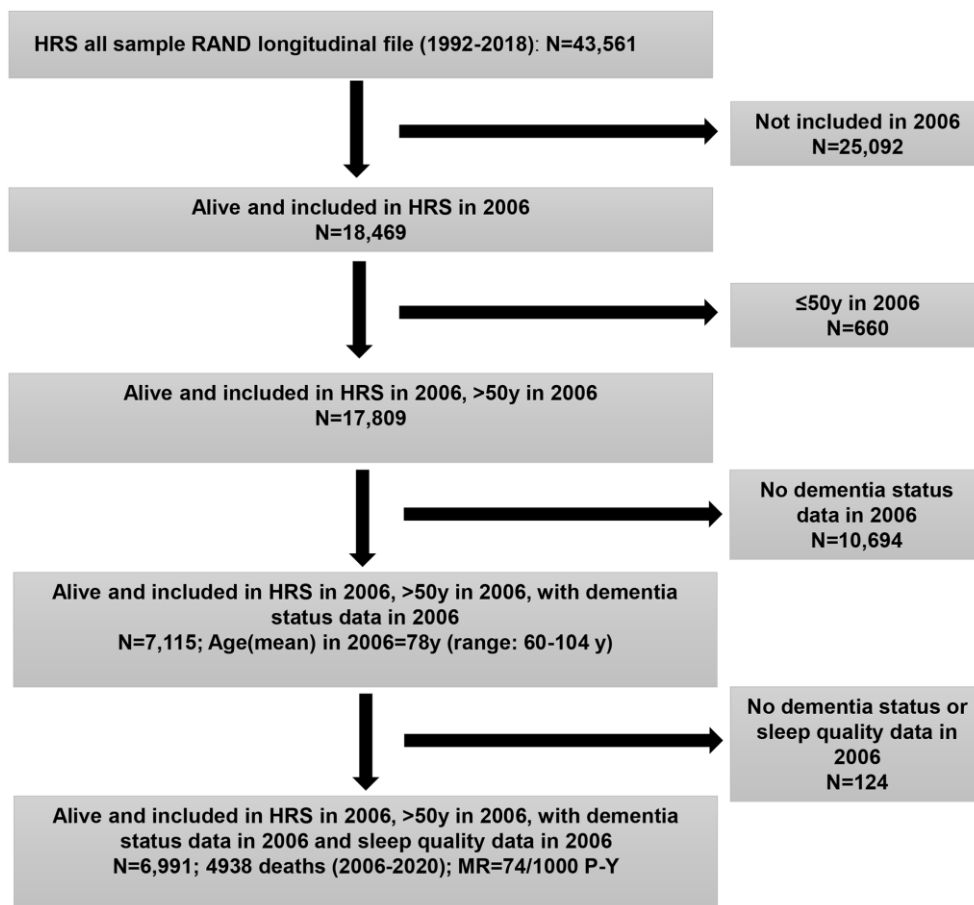

**Supplementary Figure 1. Participant flowchart.** Abbreviations: HRS: Health and Retirement Study; MR: Mortality Rate; P-Y: Person-Years.
