# Supplementary material for: Poor sleep quality, dementia status and their association with all-cause mortality among older US adults
Source: publisher site journal article supplement (doi:10.18632/aging.206102), 2024-09-04
Supplement: Supplementary file [file aging-v16i17-206102-supplementary-material-SD3.pdf]

**SUPPLEMENTARY TABLES**

**Supplementary Table 1. Dementia odds (Log<sub>e</sub> transformed) and all-cause mortality: four-way decomposition models by poor sleep quality (alternative measure), overall, by sex and by race: HRS 2006–2020<sup>a,b</sup>.**

| Y: All-cause mortality;<br>X: Poor sleep quality<br>score | TE                     |        | CDE                     |        | INTREF                    |              | INTMED                    |              | PIE                        |              |
|-----------------------------------------------------------|------------------------|--------|-------------------------|--------|---------------------------|--------------|---------------------------|--------------|----------------------------|--------------|
|                                                           | β ± SE                 | P      | β ± SE                  | P      | β ± SE                    | P            | β ± SE                    | P            | β ± SE                     | P            |
| <b>Overall</b>                                            |                        |        |                         |        |                           |              |                           |              |                            |              |
| <b>Reduced Model 1A–1C (N = 6,991)</b>                    |                        |        |                         |        |                           |              |                           |              |                            |              |
| X: Hurd                                                   | +0.39460 ±<br>0.01918  | <0.001 | +0.39453 ±<br>0.01903   | <0.001 | -0.00014 ±<br>0.00038     | 0.72         | -3.30e-07 ±<br>0.00011    | 0.99         | +0.00020 ±<br>0.00044      | 0.65         |
| X: Expert                                                 | +0.62019 ±<br>0.0298   | <0.001 | +0.62213 ±<br>0.02983   | <0.001 | +0.00044 ±<br>0.00144     | 0.76         | -0.00357 ±<br>0.00156     | <b>0.022</b> | +0.00120 ±<br>0.00081      | 0.14         |
| X: LASSO                                                  | +0.58189 ±<br>0.026789 | <0.001 | +0.58260 ±<br>0.02677   | <0.001 | -0.00025 ±<br>0.00106     | 0.81         | -0.00099 ±<br>0.00060     | 0.27         | 0.00051                    | 0.29         |
| <b>Full model 2A–2C (N = 6,510)</b>                       |                        |        |                         |        |                           |              |                           |              |                            |              |
| X: Hurd                                                   | +0.50834 ±<br>0.04784  | <0.001 | +0.46549 ±<br>0.045689  | <0.001 | +0.01968 ±<br>0.00630     | <b>0.002</b> | +0.01734 ±<br>0.00537     | <b>0.001</b> | +0.00583 ±<br>0.00204      | <b>0.004</b> |
| X: Expert                                                 | +0.38242 ±<br>0.03200  | <0.001 | +0.35769 ±<br>0.03106   | <0.001 | +0.01078 ±<br>0.00355     | <b>0.002</b> | +0.00946 ±<br>0.00281     | <b>0.001</b> | +0.0045349 ±<br>0.0015896  | <b>0.004</b> |
| X: LASSO                                                  | +0.44499 ±<br>0.03451  | <0.001 | +0.41445 ±<br>0.03359   | <0.001 | +0.01213 ±<br>0.00403     | <b>0.003</b> | +0.01275 ±<br>0.00343     | <0.001       | +0.005669 ±<br>0.00184     | <b>0.002</b> |
| <b>Male</b>                                               |                        |        |                         |        |                           |              |                           |              |                            |              |
| <b>Reduced Model 1A–1C (N = 2,931)</b>                    |                        |        |                         |        |                           |              |                           |              |                            |              |
| X: Hurd                                                   | +0.56222 ±<br>0.04511  | <0.001 | +0.55160 ±<br>0.04485   | <0.001 | +0.013821 ±<br>0.00710    | <b>0.052</b> | -0.00520 ±<br>0.00319     | 0.10         | +0.0020 ±<br>0.00150       | 0.19         |
| X: Expert                                                 | +0.60690 ±<br>0.05047  | <0.001 | +0.60239 ±<br>0.05057   | <0.001 | +0.00737 ±<br>0.00622     | 0.24         | -0.0054 ±<br>0.00406      | 0.18         | +0.00255 ±<br>0.00224      | 0.26         |
| X: LASSO                                                  | +0.57335 ±<br>0.04414  | <0.001 | +0.56778 ±<br>0.04411   | <0.001 | +0.0074 ±<br>0.00576      | 0.20         | -0.00389 ±<br>0.00278     | 0.16         | +0.00202 ±<br>0.00161      | 0.21         |
| <b>Full model 2A–2C (N = 2,698)</b>                       |                        |        |                         |        |                           |              |                           |              |                            |              |
| X: Hurd                                                   | +0.41639 ±<br>0.07245  | <0.001 | +0.36523 ±<br>±0.068596 | <0.001 | +0.040039 ±<br>0.015321   | <b>0.009</b> | +0.0085921 ±<br>0.0069285 | 0.22         | +0.002532 ±<br>0.0022419   | 0.26         |
| X: Expert                                                 | +0.26999 ±<br>0.047615 | <0.001 | +0.24175 ±<br>0.046239  | <0.001 | +0.021059 ±<br>0.0088441  | 0.017        | 0.0048072 ±<br>0.0032497  | 0.14         | +0.0023808 ±<br>±0.0018317 | 0.19         |
| X: LASSO                                                  | +0.35083 ±<br>0.051341 | <0.001 | +0.32061 ±<br>0.050018  | <0.001 | +0.021737 ±<br>0.010039   | <b>0.030</b> | +0.005549 ±<br>0.003598   | 0.12         | +0.0029342 ±<br>0.0020567  | 0.15         |
| <b>Female</b>                                             |                        |        |                         |        |                           |              |                           |              |                            |              |
| <b>Reduced Model 1A–1C (N = 4,060)</b>                    |                        |        |                         |        |                           |              |                           |              |                            |              |
| X: Hurd                                                   | +0.37611 ±<br>0.023086 | <0.001 | +0.37427 ±<br>0.022192  | <0.001 | +0.002193 ±<br>0.0026789  | 0.41         | -0.0001658 ±<br>0.0003734 | 0.66         | -0.0001828 ±<br>0.0003964  | 0.65         |
| X: Expert                                                 | +0.63458 ±<br>0.037328 | <0.001 | +0.64323 ±<br>0.037345  | <0.001 | -0.0068712 ±<br>0.0022929 | <b>0.003</b> | -0.0024374 ±<br>0.0017279 | 0.16         | +0.0006561 ±<br>0.0007173  | 0.36         |
| X: LASSO                                                  | +0.6017 ±<br>0.034544  | <0.001 | +0.60697 ±<br>0.034311  | <0.001 | -0.0053899 ±<br>0.0024186 | <b>0.026</b> | +0.0002494 ±<br>0.000989  | 0.80         | -0.0001342 ±<br>0.0005357  | 0.80         |
| <b>Full model 2A–2C (N = 3,812)</b>                       |                        |        |                         |        |                           |              |                           |              |                            |              |
| X: Hurd                                                   | +0.56999 ±<br>0.06366  | <0.001 | +0.53713 ±<br>0.061636  | <0.001 | +0.0016369 ±<br>0.00547   | 0.77         | +0.022984 ±<br>0.0078648  | <b>0.003</b> | +0.0082415 ±<br>0.00313    | <b>0.008</b> |
| X: Expert                                                 | +0.45958 ±<br>0.043156 | <0.001 | +0.44125 ±<br>0.042226  | <0.001 | -0.0015519 ±<br>0.0034798 | 0.66         | +0.013771 ±<br>0.0044423  | <b>0.002</b> | +0.0061107 ±<br>0.0023974  | <b>0.011</b> |
| X: LASSO                                                  | +0.51303 ±<br>0.046599 | <0.001 | +0.48847 ±<br>0.045698  | <0.001 | -0.0020449 ±<br>0.0037046 | 0.58         | +0.019134 ±<br>0.0055133  | <b>0.001</b> | +0.0074635 ±<br>0.0028207  | <b>0.008</b> |

| <b>White</b>                           |                        |        |                         |        |                            |       |                           |        |                            |       |
|----------------------------------------|------------------------|--------|-------------------------|--------|----------------------------|-------|---------------------------|--------|----------------------------|-------|
| <b>Reduced Model 1A–1C (N = 5,666)</b> |                        |        |                         |        |                            |       |                           |        |                            |       |
| X: Hurd                                | +0.40035 ±<br>0.021778 | <0.001 | +0.40084 ±<br>0.021522  | <0.001 | -0.0000128 ±<br>0.0009433  | 0.99  | -0.0000583 ±<br>0.0002188 | 0.79   | -0.000416 ±<br>0.0007205   | 0.56  |
| X: Expert                              | +0.65841 ±<br>0.034181 | <0.001 | +0.66013 ±<br>0.034132  | <0.001 | -0.0013205 ±<br>0.0010699  | 0.22  | -0.0013384 ±<br>0.001134  | 0.24   | +0.0009395 ±<br>0.0007591  | 0.22  |
| X: LASSO                               | +0.58944 ±<br>0.029623 | <0.001 | +0.59089 ±<br>0.029593  | <0.001 | -0.0014574 ±<br>0.0009838  | 0.14  | +0.0001398 ±<br>0.0007785 | 0.86   | -0.0001271 ±<br>0.0007059  | 0.86  |
| <b>Full model 2A–2C (N = 5,324)</b>    |                        |        |                         |        |                            |       |                           |        |                            |       |
| X: Hurd                                | +0.52799 ±<br>0.05374  | <0.001 | +0.4828 ±<br>0.051197   | <0.001 | +0.019272 ±<br>0.0071537   | 0.007 | +0.020357 ±<br>0.0064565  | 0.002  | +0.0055594 ±<br>0.0022126  | 0.012 |
| X: Expert                              | +0.43223 ±<br>0.03738  | <0.001 | +0.4029 ±<br>0.036271   | <0.001 | +0.010697 ±<br>0.0041516   | 0.010 | +0.013908 ±<br>0.0038493  | <0.001 | +0.0047164 ±<br>0.0019462  | 0.015 |
| X: LASSO                               | +0.47268 ±<br>0.039032 | <0.001 | +0.43754 ±<br>0.037907  | <0.001 | +0.012776 ±<br>0.0047307   | 0.007 | +0.017013 ±<br>0.0044407  | <0.001 | +0.0053461 ±<br>0.0021258  | 0.012 |
| <b>Black/Hispanic/Others</b>           |                        |        |                         |        |                            |       |                           |        |                            |       |
| <b>Reduced Model 1A–1C (N = 1,325)</b> |                        |        |                         |        |                            |       |                           |        |                            |       |
| X: Hurd                                | +0.36329 ±<br>0.040527 | <0.001 | +0.3657 ±<br>0.040865   | <0.001 | +0.0004392 ±<br>0.002962   | 0.88  | -0.0004587 ±<br>0.0021728 | 0.83   | -0.0023979 ±<br>0.0027029  | 0.38  |
| X: Expert                              | +0.48137 ±<br>0.060746 | <0.001 | +0.48631 ±<br>0.060752  | <0.001 | +0.011991 ±<br>0.0081179   | 0.14  | -0.011995 ±<br>0.006882   | 0.081  | -0.0049335 ±<br>0.0053335  | 0.36  |
| X: LASSO                               | +0.53417 ±<br>±0.06236 | <0.001 | +0.53799 ±<br>±0.062361 | <0.001 | +0.0063964 ±<br>±0.0064947 | 0.33  | -0.0061 ±<br>±0.0053094   | 0.25   | -0.0041111 ±<br>±0.0041556 | 0.32  |
| <b>Full model 2A–C (N = 1,186)</b>     |                        |        |                         |        |                            |       |                           |        |                            |       |
| X: Hurd                                | +0.41074 ±<br>0.10575  | <0.001 | +0.38256 ±<br>0.10227   | <0.001 | +0.015644 ±<br>0.014372    | 0.28  | +0.0061412 ±<br>0.0073845 | 0.41   | +0.0063943 ±<br>0.0067089  | 0.34  |
| X: Expert                              | +0.22672 ±<br>0.061705 | <0.001 | +0.21797 ±<br>0.05989   | <0.001 | +0.0077981 ±<br>0.0082535  | 0.35  | +0.0002961 ±<br>0.0021035 | 0.89   | +0.0006594 ±<br>0.0046543  | 0.89  |
| X: LASSO                               | +0.34001 ±<br>0.075128 | <0.001 | +0.32957 ±<br>0.073668  | <0.001 | +0.0044248 ±<br>0.0090454  | 0.63  | +0.0014626 ±<br>0.0026447 | 0.58   | +0.004556 ±<br>0.00579     | 0.43  |

Abbreviations: CDE: Controlled Direct Effect; HRS: Health and Retirement Study; INTMED: Mediated Interaction; INTREF: Interaction Referent; PIE: Pure Indirect Effect; SE: Standard Error. <sup>a</sup>Cox PH regression models with mortality as the main outcome and poor sleep quality as the potential mediator/moderator allowed to interact with the main exposure. Log<sub>e</sub> (odds (dementia probability)) using Hurd, expert and LASSO algorithms were the main alternative exposures of interest, sample size N = 6,991, four-way decomposition analysis. 1 SD of the “poor sleep quality score” corresponded to 0.72-point higher score. 1 SD of Hurd, expert and LASSO algorithm Log<sub>e</sub> (dementia probability) corresponded to 3.93, 3.13 and 2.40, respectively. <sup>b</sup>Exogenous variables are the ones included in Table 2, Models 1A–1D and 2A–2D, as covariates for the reduced and full models, respectively. See Covariates section for detail.

**Supplementary Table 2. Poor sleep quality (alternative measure) and all-cause mortality: four-way decomposition models by dementia odds (Log<sub>e</sub> transformed), overall, by sex and by race, HRS 2006–2020<sup>a,b</sup>.**

| Y: All-cause mortality;<br>X: Poor sleep quality<br>score | TE                       |                  | CDE                     |                  | INTREF                    |                  | INTMED                    |                  | PIE                       |                  |
|-----------------------------------------------------------|--------------------------|------------------|-------------------------|------------------|---------------------------|------------------|---------------------------|------------------|---------------------------|------------------|
|                                                           | $\beta \pm SE$           | <i>P</i>         | $\beta \pm SE$          | <i>P</i>         | $\beta \pm SE$            | <i>P</i>         | $\beta \pm SE$            | <i>P</i>         | $\beta \pm SE$            | <i>P</i>         |
| <b>Overall</b>                                            |                          |                  |                         |                  |                           |                  |                           |                  |                           |                  |
| <b>Reduced model 1A–1C (N = 6,991)</b>                    |                          |                  |                         |                  |                           |                  |                           |                  |                           |                  |
| M: Hurd                                                   | +0.030902 ±<br>0.015271  | <b>0.043</b>     | +0.030249 ±<br>0.014538 | <b>0.037</b>     | -0.0009163 ±<br>0.002958  | 0.76             | +0.00000325 ±<br>0.000066 | 0.96             | +0.0015668 ±<br>0.003409  | 0.65             |
| M: Expert                                                 | +0.022314 ±<br>0.01533   | 0.14             | +0.023319 ±<br>0.014172 | 0.10             | -0.014888 ±<br>0.0040651  | <b>&lt;0.001</b> | -0.001674 ±<br>0.0007357  | <b>0.023</b>     | +0.015558 ±<br>0.0048172  | <b>0.001</b>     |
| M: LASSO                                                  | +0.021734 ±<br>0.015277  | 0.16             | +0.029001 ±<br>0.014166 | <b>0.029</b>     | -0.012448 ±<br>0.0040104  | <b>0.002</b>     | -0.0005014 ±<br>0.0004548 | 0.27             | +0.0056822 ±<br>0.0046441 | 0.22             |
| <b>Full model 2A–2C (N = 6,510)</b>                       |                          |                  |                         |                  |                           |                  |                           |                  |                           |                  |
| M: Hurd                                                   | -0.071307 ±<br>0.015996  | <b>&lt;0.001</b> | -0.069697 ±<br>0.016273 | <b>&lt;0.001</b> | +0.0056935 ±<br>0.0017507 | <b>&lt;0.001</b> | +0.0039003 ±<br>0.0011567 | <b>0.001</b>     | -0.011204 ±<br>0.0029377  | <b>&lt;0.001</b> |
| M: Expert                                                 | -0.072455 ±<br>0.016005  | <b>&lt;0.001</b> | -0.065013 ±<br>0.016198 | <b>&lt;0.001</b> | +0.0008955 ±<br>0.0012469 | 0.47             | +0.0038437 ±<br>0.0010987 | <b>&lt;0.001</b> | -0.012181 ±<br>0.0030042  | <b>&lt;0.001</b> |
| M: LASSO                                                  | -0.074468 ±<br>0.015933  | <b>&lt;0.001</b> | -0.065691 ±<br>0.016257 | <b>&lt;0.001</b> | +0.0023859 ±<br>0.0013247 | <i>0.072</i>     | +0.0045361 ±<br>0.0011665 | <b>&lt;0.001</b> | -0.015699 ±<br>0.0032712  | <b>&lt;0.001</b> |
| <b>Male</b>                                               |                          |                  |                         |                  |                           |                  |                           |                  |                           |                  |
| <b>Reduced Model 1A–1C (N = 2,931)</b>                    |                          |                  |                         |                  |                           |                  |                           |                  |                           |                  |
| M: Hurd                                                   | +0.036394 ±<br>0.023714  | 0.13             | +0.03855 ±<br>0.022696  | <i>0.085</i>     | -0.012609 ±<br>0.0038722  | <b>0.001</b>     | -0.002007 ±<br>0.0012411  | 0.11             | +0.01246 ±<br>0.0061561   | <b>0.043</b>     |
| M: Expert                                                 | +0.041568 ±<br>0.023999  | <i>0.083</i>     | +0.026619 ±<br>0.022592 | 0.24             | -0.0079929 ±<br>0.004602  | <i>0.082</i>     | -0.0020728 ±<br>0.0015948 | 0.19             | +0.025015 ±<br>0.0068767  | <b>&lt;0.001</b> |
| M: LASSO                                                  | +0.040998 ±<br>0.023893  | <i>0.086</i>     | +0.031346 ±<br>0.022755 | 0.17             | -0.0074983 ±<br>0.003495  | <b>0.032</b>     | -0.0017166 ±<br>0.0012603 | 0.17             | +0.018867 ±<br>0.0068946  | <b>0.006</b>     |
| <b>Full Model 2A–2C (N = 2,698)</b>                       |                          |                  |                         |                  |                           |                  |                           |                  |                           |                  |
| M: Hurd                                                   | -0.049922 ±<br>0.025342  | <b>0.049</b>     | -0.054646 ±<br>0.02556  | <b>0.033</b>     | +0.0074653 ±<br>0.0031169 | <b>0.017</b>     | +0.0018204 ±<br>0.0014413 | 0.21             | -0.0045613 ±<br>0.0034561 | 0.19             |
| M: Expert                                                 | -0.049416 ±<br>0.025435  | <i>0.052</i>     | -0.051529 ±<br>0.025562 | <b>0.044</b>     | +0.0055075 ±<br>0.0026007 | <b>0.034</b>     | +0.0019059 ±<br>0.0012649 | 0.13             | -0.0053001 ±<br>0.0031745 | <i>0.095</i>     |
| M: LASSO                                                  | -0.051863 ±<br>0.025306  | <b>0.040</b>     | -0.057227 ±<br>0.026158 | <b>0.029</b>     | +0.01078 ±<br>0.0043433   | <b>0.013</b>     | +0.001954 ±<br>0.0012319  | 0.11             | -0.0073697 ±<br>0.0039338 | <i>0.061</i>     |
| <b>Female</b>                                             |                          |                  |                         |                  |                           |                  |                           |                  |                           |                  |
| <b>Reduced Model 1A–1C (N = 4,060)</b>                    |                          |                  |                         |                  |                           |                  |                           |                  |                           |                  |
| M: Hurd                                                   | +0.021244 ±<br>0.01996   | 0.29             | +0.020074 ±<br>0.018716 | 0.28             | +0.0036149 ±<br>0.0047921 | 0.45             | -0.0001155 ±<br>0.0002588 | 0.66             | -0.0023297 ±<br>0.0045684 | 0.61             |
| M: Expert                                                 | +0.0092236 ±<br>0.019975 | 0.64             | +0.01992 ±<br>0.018151  | 0.27             | -0.020214 ±<br>0.006299   | <b>0.001</b>     | -0.0012756 ±<br>0.0009076 | 0.16             | +0.010794 ±<br>0.0067233  | 0.11             |
| M: LASSO                                                  | +0.0088882 ±<br>0.019948 | 0.66             | +0.025951 ±<br>0.018025 | 0.15             | -0.015572 ±<br>0.0068724  | <b>0.023</b>     | +0.0001363 ±<br>0.0005395 | 0.80             | -0.0016275 ±<br>0.0063951 | 0.80             |
| <b>Full Model 2A–2C (N = 3,812)</b>                       |                          |                  |                         |                  |                           |                  |                           |                  |                           |                  |
| M: Hurd                                                   | -0.087193 ±<br>0.020602  | <b>&lt;0.001</b> | -0.080351 ±<br>0.021098 | <b>&lt;0.001</b> | +0.0039831 ±<br>0.0021884 | <i>0.069</i>     | +0.0053083 ±<br>0.0017144 | <b>0.002</b>     | -0.016134 ±<br>0.0044396  | <b>&lt;0.001</b> |
| M: Expert                                                 | -0.089694 ±<br>0.020571  | <b>&lt;0.001</b> | -0.073317 ±<br>0.020868 | <b>&lt;0.001</b> | -0.0041846 ±<br>0.0021176 | <b>0.048</b>     | +0.0056334 ±<br>0.0017336 | <b>0.001</b>     | -0.017826 ±<br>0.0047459  | <b>&lt;0.001</b> |
| M: LASSO                                                  | -0.091803 ±<br>0.020474  | <b>&lt;0.001</b> | -0.068552 ±<br>0.020738 | <b>0.001</b>     | -0.0076524 ±<br>0.0023243 | <b>0.001</b>     | +0.0068409 ±<br>0.0018637 | <b>&lt;0.001</b> | -0.022439 ±<br>0.0049456  | <b>&lt;0.001</b> |
| <b>White</b>                                              |                          |                  |                         |                  |                           |                  |                           |                  |                           |                  |
| <b>Reduced Model 1A–1C (N = 5,666)</b>                    |                          |                  |                         |                  |                           |                  |                           |                  |                           |                  |
| M: Hurd                                                   | +0.042615 ±<br>0.017248  | <b>0.013</b>     | +0.045593 ±<br>0.016644 | <b>0.006</b>     | -0.0006782 ±<br>0.00257   | 0.79             | -0.0000424 ±<br>0.0001336 | 0.75             | -0.0022575 ±<br>0.0038237 | 0.56             |
| M: Expert                                                 | +0.035484 ±<br>0.017316  | <b>0.040</b>     | +0.038322 ±<br>0.016226 | <b>0.018</b>     | -0.010111 ±<br>0.00365    | <b>0.006</b>     | -0.000566 ±<br>0.0004904  | 0.25             | +0.0078392 ±<br>0.0054609 | 0.15             |
| M: LASSO                                                  | +0.032891 ±<br>0.017185  | <i>0.056</i>     | +0.043853 ±<br>0.016208 | <b>0.007</b>     | -0.010087 ±<br>0.003663   | <b>0.006</b>     | +0.0000682 ±<br>0.0003795 | 0.86             | -0.0009427 ±<br>0.0052236 | 0.86             |

| <b>Full model 2A–2C (N = 5,324)</b>    |                         |        |                         |       |                           |        |                           |        |                           |        |
|----------------------------------------|-------------------------|--------|-------------------------|-------|---------------------------|--------|---------------------------|--------|---------------------------|--------|
| M: Hurd                                | -0.056391 ±<br>0.017887 | 0.002  | -0.061824 ±<br>0.01847  | 0.001 | +0.013754 ±<br>0.0031299  | <0.001 | +0.0045156 ±<br>0.0013674 | 0.001  | -0.012836 ±<br>0.0033782  | <0.001 |
| M: Expert                              | -0.057803 ±<br>0.017899 | 0.001  | -0.052722 ±<br>0.018373 | 0.004 | +0.0065844 ±<br>0.0020024 | 0.001  | +0.0051515 ±<br>0.001365  | <0.001 | -0.016816 ±<br>0.0036252  | <0.001 |
| M: LASSO                               | -0.05932 ±<br>0.017815  | 0.001  | -0.054199 ±<br>0.018439 | 0.003 | +0.0081853 ±<br>0.0022739 | <0.001 | +0.0058666 ±<br>0.0014602 | <0.001 | -0.019172 ±<br>0.003814   | <0.001 |
| <b>Non-White</b>                       |                         |        |                         |       |                           |        |                           |        |                           |        |
| <b>Reduced Model 1A–1C (N = 1,325)</b> |                         |        |                         |       |                           |        |                           |        |                           |        |
| M: Hurd                                | -0.016372 ±<br>0.033019 | 0.62   | -0.03019 ±<br>0.030445  | 0.32  | -0.0018161 ±<br>0.01184   | 0.88   | -0.0002873 ±<br>0.001341  | 0.83   | +0.015922 ±<br>0.0076197  | 0.037  |
| M: Expert                              | -0.02867 ±<br>0.033247  | 0.39   | -0.02983 ±<br>0.030918  | 0.34  | -0.032022 ±<br>0.016716   | 0.055  | -0.0070443 ±<br>0.0039502 | 0.075  | +0.040226 ±<br>0.010528   | <0.001 |
| M: LASSO                               | -0.023034 ±<br>0.033538 | 0.48   | -0.031699 ±<br>0.029852 | 0.29  | -0.018889 ±<br>0.015875   | 0.23   | -0.0031746 ±<br>0.0027188 | 0.24   | +0.030728 ±<br>0.010316   | 0.003  |
| <b>Full model 2A–2C (N = 1,186)</b>    |                         |        |                         |       |                           |        |                           |        |                           |        |
| M: Hurd                                | -0.13108 ±<br>0.036592  | <0.001 | -0.1111 ±<br>0.037134   | 0.003 | -0.015845 ±<br>0.010362   | 0.13   | +0.0014531 ±<br>0.0016788 | 0.39   | -0.0055812 ±<br>0.0056183 | 0.32   |
| M: Expert                              | -0.13057 ±<br>0.036569  | <0.001 | -0.11974 ±<br>0.037074  | 0.001 | -0.010308 ±<br>0.0085493  | 0.23   | +0.0001613 ±<br>0.0011436 | 0.89   | -0.0006843 ±<br>0.0048254 | 0.89   |
| M: LASSO                               | -0.13464 ±<br>0.036457  | <0.001 | -0.12457 ±<br>0.036056  | 0.001 | -0.005761 ±<br>0.0085282  | 0.50   | +0.0006235 ±<br>0.0010289 | 0.54   | -0.0049392 ±<br>0.0061316 | 0.42   |

Abbreviations CDE: Controlled Direct Effect; HRS: Health and Retirement Study; INTMED: Mediated Interaction; INTREF: Interaction Referent; PIE: Pure Indirect Effect; SE: Standard Error. <sup>a</sup>Cox PH regression models with mortality as the main outcome and poor sleep quality as the exposure. Log<sub>e</sub> (odds (dementia probability)) using Hurd, expert and LASSO algorithms were potential mediators/moderators allowed to interact with the main exposure, four-way decomposition analysis. 1 SD of the “poor sleep quality score” corresponded to 0.72-point higher score. 1 SD of Hurd, expert and LASSO algorithm Log<sub>e</sub> (dementia probability) corresponded to 3.93, 3.13 and 2.40, respectively. <sup>b</sup>Exogenous variables are the ones included in Table 2, Models 1A–1D and 2A–2D, as covariates for the reduced and full models, respectively. See Covariates section for detail.
